1 **Title:** Heterogeneous nuclear ribonucleoprotein K is overexpressed in acute myeloid leukemia  
2 and causes myeloproliferative disease in mice via altered *Runx1* splicing

3  
4 **Authors:** Marisa J. L. Aitken<sup>1,2\*</sup>, Purna Malaney<sup>1\*</sup>, Xiaorui Zhang<sup>1</sup>, Shelley M. Herbrich<sup>1,2</sup>,  
5 Lauren Chan<sup>1</sup>, Huaxian Ma<sup>1</sup>, Rodrigo Jacamo<sup>1</sup>, Ruizhi Duan<sup>3,4</sup>, Todd M. Link<sup>5</sup>, Steven M.  
6 Kornblau<sup>1</sup>, Rashmi Kanagal-Shamanna<sup>6</sup>, Carlos E. Bueso-Ramos<sup>6</sup>, and Sean M. Post<sup>1\*\*</sup>

7  
8 **Affiliations:**

9 <sup>1</sup>Department of Leukemia, The University of Texas MD Anderson Cancer Center, Houston, TX,  
10 USA

11 <sup>2</sup>The University of Texas MD Anderson Cancer Center UTHealth Graduate School of  
12 Biomedical Sciences, Houston, TX, USA

13 <sup>3</sup>School of Health Professions, The University of Texas MD Anderson Cancer Center, Houston,  
14 TX, USA

15 <sup>4</sup>Baylor College of Medicine, Houston, TX, USA

16 <sup>5</sup>Department of Molecular and Cellular Oncology, The University of Texas MD Anderson Cancer  
17 Center, Houston, TX, USA

18 <sup>6</sup>Department of Hematopathology, The University of Texas MD Anderson Cancer Center,  
19 Houston, TX, USA

20 \*These authors contributed equally

21 \*\*To whom correspondence should be addressed

22

23 **Corresponding Author:** Sean M. Post, Ph.D.

24 Email: [spost@mdanderson.org](mailto:spost@mdanderson.org)

25 Department of Leukemia, The University of Texas MD Anderson Cancer Center 1515 Holcombe  
26 Blvd, Houston, TX 77030, USA

27 **Running title:** hnRNP K overexpression in AML

28

29 **Keywords:** hnRNP K, RNA-binding protein, splicing, RUNX1, leukemia, mouse model

30

### 31 **Highlights**

- 32 • hnRNP K, an RNA binding protein, is overexpressed in AML and correlates with poor  
33 clinical outcomes
- 34 • hnRNP K overexpression in murine HSPCs drives fatal myeloproliferative phenotypes in  
35 mice
- 36 • hnRNP K's oncogenicity can be attributed, at least in part, to its ability to bind and  
37 influence the splicing of the *RUNX1* transcript

38

### 39 **Summary**

40 Acute myeloid leukemia (AML) is driven by numerous molecular events that contribute to  
41 disease progression. Herein, we identified hnRNP K overexpression as a recurrent abnormality  
42 in AML that is associated with inferior patient outcomes. In murine hematopoietic stem and  
43 progenitor cells, hnRNP K overexpression altered self-renewal and differentiation potential.  
44 Furthermore, murine transplantation models revealed that hnRNP K overexpression resulted in  
45 fatal myeloproliferative phenotypes. Using unbiased approaches, we discovered a direct  
46 relationship between hnRNP K and *RUNX1*—a master transcriptional regulator of  
47 hematopoiesis often dysregulated in leukemia. Molecular analyses revealed hnRNP K-  
48 dependent alternative splicing of *RUNX1*, resulting in the generation of a functionally distinct  
49 isoform. Taken together, we have established hnRNP K as an oncogene in myeloid leukemia  
50 that binds *RUNX1* RNA, altering its splicing and subsequent transcriptional activity. These  
51 findings shed new light on a mechanism of myeloid leukemogenesis, paving the way for new  
52 drug discovery efforts.



53

## 54 **Introduction**

55 Acute myeloid leukemia (AML) is an often devastating hematologic malignancy wherein  
56 normal hematopoiesis is superseded by rapid proliferation of incompletely differentiated myeloid  
57 cells. Taken as a whole, younger patients (<60 years) with AML have a 5-year overall survival of  
58 approximately 40%, while older patients tend to have much worse outcomes, with 5-year OS  
59 verging on 10% (Dohner et al., 2015; Juliusson et al., 2009; Slovak et al., 2000). Identification of  
60 recurrent genomic events in AML (e.g.; mutations in *FLT3* or *IDH1/2*) has led to development of  
61 targeted therapeutic agents that improve patient outcomes and quality of life; however, many  
62 patients lack these genomic alterations, rendering them ineligible for such treatments.  
63 Furthermore, despite prolonging life, patients treated with these agents are often still at risk for  
64 relapse (DiNardo et al., 2018; Perl et al., 2019; Stein et al., 2019; Stone et al., 2017),  
65 highlighting the need to understand the molecular underpinnings of AML such that alternative,  
66 effective therapeutic options can be developed.

67 Myeloid malignancies, including AML and its frequently associated precursor condition  
68 myelodysplastic syndrome (MDS), often have alterations in RNA-binding proteins (RBPs).  
69 Splicing factors such as SRSF2, SF3B1, and U2AF1 are widely known RBPs in this context,  
70 and are often mutated (Graubert et al., 2011; Papaemmanuil et al., 2011; Yoshida et al., 2011).  
71 Importantly, other RBPs such as MUSASHI2, METTL3 are also aberrantly expressed, though  
72 infrequently mutated, in hematologic malignancies, and have been identified as critical to the  
73 pathogenesis of AML (Kharas et al., 2010b; Saha et al., 2019; Vu et al., 2017; Wang et al.,  
74 2019). Drugs targeting splicing or other RNA-binding properties of these proteins have been  
75 developed with therapeutic intent (Minuesa et al., 2019; Seiler et al., 2018). However, the roles  
76 of other RBPs in myeloid malignancies, including AML, have not been extensively deciphered.

77 An RBP of accumulating interest in hematologic and solid malignancies is  
78 heterogeneous nuclear ribonucleoprotein K (hnRNP K). Overexpression of hnRNP K has been

79 associated with adverse pathology in a handful of small clinical studies evaluating solid tumors  
80 (Barboro et al., 2009; Carpenter et al., 2006; Chen et al., 2010; Wen et al., 2010; Zhou et al.,  
81 2010). Further, elevated hnRNP K expression is not uncommon in B-cell lymphoma and has  
82 been defined as an oncogene in this setting (Gallardo et al., 2019). These findings led to  
83 consideration that hnRNP K aberrancies may contribute to a broader array of hematologic  
84 malignancies. Because the expression and role of hnRNP K in AML is less clear, we sought to  
85 evaluate hnRNP K in this context.

86 Aberrations of RBPs often impact the expression of genes or proteins implicated in  
87 hematologic malignancies. For instance, *RUNX1* is a crucial hematopoietic transcription factor  
88 with several isoforms that emerge due to alternative promoter usage and alternative splicing  
89 (Ghozi et al., 1996; Komeno et al., 2014; Miyoshi et al., 1995; Tanaka et al., 1995). *RUNX1* is a  
90 common target of translocations or mutations in leukemias, including AML (De Braekeleer et al.,  
91 2011; Osato, 2004; Osato et al., 1999). Interestingly, expression of different *RUNX1* isoforms  
92 arising via alternative splicing, specifically around exon 6, also alter hematopoiesis (Ghanem et  
93 al., 2018; Komeno et al., 2014; Sun et al., 2020).

94 In this study, we address the hypothesis that hnRNP K is overexpressed in AML,  
95 impacts clinic outcomes, and that this overexpression contributes to myeloid aberrations in a  
96 murine model. We find that hnRNP K overexpression leads to extramedullary hematopoiesis,  
97 gross hematopoietic abnormalities, and premature death in mice. Mechanistically, we identified  
98 that hnRNP K alters *RUNX1* splicing via its RNA-binding properties. hnRNP K interacts with  
99 *RUNX1* RNA in a sequence-specific manner, in humans and mice, and causes exclusion of  
100 *RUNX1* exon 6 (*RUNX1ΔEx6*), ultimately leading to expression of a more stable *RUNX1* isoform  
101 with altered transcriptional activity. Further, expression of *RUNX1ΔEx6* recapitulates an *in vitro*  
102 phenotype associated with hnRNP K overexpression, supporting the notion that hnRNP K  
103 mediates its hematopoietic alterations, at least in part, via altered *RUNX1* splicing. Finally, we

104 identify that the RNA-binding KH3 domain of hnRNP K is a critical mediator of this *RUNX1*  
105 splicing event.

106 Taken together, these studies identify hnRNP K as a potential driver alteration in AML,  
107 nominating this protein as a putative drug target. In addition, hnRNP K-mediated altered splicing  
108 of *RUNX1* provides an alternate mechanism whereby *RUNX1* is altered in AML in the absence  
109 of mutations or translocations. Finally, the methods used in this manuscript and the identification  
110 of specific domains of hnRNP K implicated in this splicing alteration provide a valuable set of  
111 tools to develop drugs that specifically disrupt hnRNP K-RNA interactions.

112

## 113 **Methods**

114 *Reverse phase protein array (RPPA) data:* Data is publicly available at [www.leukemiaatlas.org](http://www.leukemiaatlas.org)  
115 (Hu et al., 2019). hnRNP K protein expression was compared to the median of healthy donor  
116 CD34+ bone marrow specimens.

117 *Plasmids:* For generation of stable cell lines, lentiviral plasmids containing full-length hnRNP K,  
118 hnRNP K domain deletions, full-length *RUNX1*, or *RUNX1* $\Delta$ Ex6 cDNA were cloned into the  
119 XhoI/NotI sites in the all-in-one tetracycline inducible lentiviral vector TRE3G-ORF-P2A-eGFP-  
120 PGK-Tet3G-bsd (TLO2026, transOMIC Technologies, Huntsville, AL). For retroviral plasmids  
121 used in fetal liver cells, the MSCV-AML1/ETO-IRES-GFP plasmid was obtained from Addgene  
122 (Addgene plasmid #60832; <http://n2t.net/addgene:60832>; RRID:Addgene\_60832 (Zuber et al.,  
123 2009)) and *AML1/ETO* cDNA replaced with *HNRNPK*, *HNRNPK* $\Delta$ *KH3*, *RUNX1(b)*, or  
124 *RUNX1* $\Delta$ Ex6 amplified from cDNA obtained from 293T cells and the pINDUCER-21-*RUNX1*  
125 plasmid (Addgene plasmid #97043; <http://n2t.net/addgene:97043>; RRID:Addgene\_97043  
126 (Sugimura et al., 2017)), respectively. Cloning was done in XhoI/EcoRI sites in the MSCV-IRES-  
127 GFP plasmid. For generation of stably knocked down cell lines, tetracycline-inducible human

128 HNRNPK PGK-TurboRFP shRNAs were purchased from Dharmacon (clone ID:  
129 V3IHSPGR\_10844995 mature antisense TCGACGAGGGCTCATATCA, targeting exon 10), and  
130 two targeting the 3' UTR, referred to as shHNRNPK ex16-1 (clone ID: V3IHSPGR\_5114248,  
131 mature antisense AAGACACTAGAGCAAATTG) and shHNRNPK ex16-2 (clone ID:  
132 V3IHSPGR\_9103684, mature antisense ATAAAATCCACTCACTCTG), and control PGK-  
133 TurboRFP (VSC11656, mature antisense TGGTTTACATGTTGTGTGA; Lafayette, CO).

134 For transient transfections, hnRNP K domain deletions (amplified with nested PCR (Ho  
135 et al., 1989)), *RUNX1(b)*, or *RUNX1ΔEx6* were ligated into XhoI/EcoRI restriction sites in the c-  
136 Flag pcDNA3vector (Addgene plasmid #20011; <http://n2t.net/addgene:20011>;  
137 RRID:Addgene\_20011) (Sanjabi et al., 2005). Reporter assays to assess RUNX1 transcriptional  
138 activity were done using the pMCSF-R-luc plasmid (Addgene plasmid #12420;  
139 <http://n2t.net/addgene:12420>; RRID:Addgene\_12420) (Zhang et al., 1994). The pCMV β-  
140 galactosidase plasmid was a gift from Dr. Vrushank Davé (University of South Florida).

141 *Stable cell line generation:* Cell lines were spun for 90 minutes at 600 x g with filtered viral  
142 supernatant from 293T cells transfected with indicated plasmids (see above), and pCMV-VSV-  
143 G/pCMV-dR8.2 for human cell lines (Addgene plasmid #8454; <http://n2t.net/addgene:8454>;  
144 RRID:Addgene\_8454 and Addgene plasmid #8455; <http://n2t.net/addgene:8455>;  
145 RRID:Addgene\_8455, respectively (Stewart et al., 2003)) or pCL-ECO for fetal liver cells  
146 (Addgene plasmid #12371; <http://n2t.net/addgene:12371>; RRID:Addgene\_12371 (Naviaux et  
147 al., 1996)). Human cells were selected in antibiotic (puromycin or blasticidin, Fisher Scientific,  
148 Waltham, MA) and appropriate fluorescence >90% required prior to downstream assays. Cells  
149 were maintained in strict tetracycline-free conditions until induction with 0.2 μg/mL doxycycline  
150 (Sigma-Aldrich, St. Louis, MO) for shRNA and 0.4 μg/mL doxycycline for overexpression.  
151 HSPCs were sorted for GFP positivity 72 hours after infection.

152 *HSPC isolation, transduction, and transplantation:* All mouse studies were performed with  
153 approval from the Institutional Animal Care and Use Committee at MD Anderson under protocol  
154 0000787-RN01/2. Pregnant wildtype CD45.2+ C57Bl/6 females were euthanized via CO<sub>2</sub>  
155 exposure at day 13.5 of gestation, fetal livers dissected, and disrupted on a 70 μm filter into  
156 single-cell suspension. Cells were briefly subjected to red blood cell lysis (BD Pharm Lyse, BD  
157 Biosciences, San Jose, CA) and resuspended in medium containing 37% DMEM (Corning Inc,  
158 Corning, NY), 37% Iscove's modified Dulbecco's Medium (Corning Inc, Corning, NY), 20% fetal  
159 bovine serum, 2% L-glutamine (200mM; Corning Inc, Corning, NY), 100 U/mL  
160 penicillin/streptomycin (Sigma-Aldrich, St. Louis, MO), 5x10<sup>-5</sup> M 2-mercaptoethanol (Sigma-  
161 Aldrich, St. Louis, MO), recombinant murine IL-3 (0.2 ng/mL), IL-6 (2 ng/mL), and SCF (20  
162 ng/mL; Stem Cell Technologies, Vancouver, BC) at high density overnight at 37°C prior to  
163 retroviral transduction (Schmitt et al., 2002; Zuber et al., 2009). For transplantation assays,  
164 NOD-scid-IL2R-gamma (NSG) mice were irradiated with 2.5 Gy prior to injection of 50,000  
165 sorted cells into the retro-orbital sinus.

166 *Immunoblotting:* Cells were homogenized in NP40 lysis buffer and standard immunoblotting  
167 procedures performed as previously described (Gallardo et al., 2019) using antibodies against  
168 hnRNP K (3C2), RUNX1 (EPR3099, both from Abcam, Cambridge, MA), β-actin (AC-15, Santa  
169 Cruz Biotechnology, Dallas, TX), Flag (F1804, Sigma Aldrich), HSP90 (ADI-SPA-836-D, Enzo  
170 Life Sciences)

171 *Colony formation assay:* GFP-sorted HSPCs were cultured in Methocult (M3434, StemCell  
172 Technologies, Vancouver, BC). Colonies were counted after 7 days then gently disrupted in  
173 PBS and cells counted subjected to cytospin or flow cytometry.

174 *Flow cytometry:* Cells were pre-treated with murine Fc block (TruStain FcX, BioLegend, San  
175 Diego, CA,) at room temperature for 15 minutes then incubated with antibodies Gr1 [RB6-8C5],

176 CD11b [M1/70;], CD117 [2B8], CD45 [30F11] (all from BD Biosciences, East Rutherford, NJ),  
177 and Sca-1 [D7; eBioscience, San Diego, CA,]. Flow cytometry was performed on a Gallios flow  
178 cytometer (Beckman Coulter, Brea, CA,). Data was analyzed using FlowJo (Beckton Dickinson,  
179 Franklin Lakes, NJ).

180 *Tissue harvest:* Spleen, liver, and sternum were collected and immediately fixed in 10% neutral-  
181 buffered formalin. Paraffin-embedded blocks were sectioned and stained with standard  
182 hematoxylin/eosin. Cells were also collected from femurs and a portion of the spleen in a single  
183 cell suspension, subjected to RBC lysis, and processed for western blotting or qRT-PCR as  
184 described herein.

185 *Immunohistochemistry:* Formalin-fixed paraffin-embedded tissues were deparaffinized in xylene  
186 and rehydrated in an alcohol gradient. Following antigen retrieval with citrate (pH 6.0), slides  
187 were incubated with 3% hydrogen peroxide/methanol prior to incubation with primary antibody  
188 at 4°C overnight. Primary antibodies: hnRNP K [3C2], CD3 [SP162], MPO [ab9535], CD14  
189 [4B4F12] (Abcam, Cambridge, MA), CD34 [MEC14.7], CD117 [2B8] (ThermoFisher Scientific,  
190 Waltham, MA). Antibody-protein interactions were visualized with Vectastain Elite ABC and DAB  
191 peroxidase substrate kits (Vector Laboratories, Burlingame, CA) and counterstained with  
192 nuclear fast red.

193 *Peripheral blood analysis:* Complete blood counts were performed with an ABX Pentra analyzer  
194 (Horiba, Kyoto, Japan). Peripheral blood smears were stained with Wright-Giemsa.

195 *RNA-Sequencing:* RNA was extracted and purified from GFP+ sorted HSPCs using Zymo  
196 Quick-RNA columns (Zymo Research, Irvine, CA). Barcoded, Illumina-stranded total RNA  
197 libraries were prepared using the TruSeq Stranded Total RNA Sample Preparation Kit (Illumina,  
198 San Diego, CA). Briefly, 250ng of DNase I-treated total RNA was depleted of cytoplasmic and

199 mitochondrial ribosomal RNA (rRNA) using Ribo-Zero Gold (Illumina, San Diego, CA). After  
200 purification, RNA was fragmented using divalent cations and double stranded cDNA was  
201 synthesized using random primers. The ends of the resulting double stranded cDNA fragments  
202 were repaired, 5'-phosphorylated, 3'-A tailed and Illumina-specific indexed adapters are were  
203 ligated. The products were purified and enriched by 12 cycles of PCR to create the final cDNA  
204 library. The libraries were quantified by qPCR and assessed for size distribution using the 4200  
205 TapeStation High Sensitivity D1000 ScreenTape (Agilent Technologies, Santa Clara, CA) then  
206 multiplexed 3 libraries per lane and sequenced on the Illumina HiSeq4000 sequencer (Illumina,  
207 San Diego, CA) using the 75 bp paired end format.

208 *RNA-Seq analysis:* Fastq files were pseudoaligned using Kallisto v0.44.0 (Bray et al., 2016) with  
209 30 bootstrap samples to a transcriptome index based on the *Mus musculus* GRCm38 release  
210 (Ensembl). The resulting abundance data was further analyzed with Sleuth v0.30.0 (Pimentel et  
211 al., 2017) using models with covariates for both batch and condition. Gene-level 80 abundance  
212 estimates were calculated as the sum of transcripts per million (TPM) estimates of all transcripts  
213 mapped to a given gene. Wald tests were performed at a gene level for the “condition” covariate  
214 with a significance threshold of FDR <10%.

215 *fRIP analysis:* Previously published data deposited to the Gene Expression Omnibus  
216 (GSE126479) was cross-referenced with known tumor suppressors and oncogenes.

217 *Identification of putative hnRNP K binding sites:* As described previously (Gallardo et al., 2019),  
218 a computer-based algorithm was used that scan transcripts of interest for two or more  
219 (U/C)CCC motifs within 19 nucleotides.

220 *Fluorescence anisotropy (FA):* Recombinant hnRNP K protein, produced in E.coli as described  
221 previously (Gallardo et al., 2019), was serially diluted in PBS (0.1 nM to 10  $\mu$ M) and incubated

222 with 6-FAM labelled RNA oligonucleotides. FA values were measured with excitation  
223 wavelength 485 nm and emission wavelength 528 nm on a Synergy Neo multi-mode plate  
224 reader (BioTek, Winooski, VT). Data was fit to the following equation:  
225  $FA = FA_i + B_{max} * [oligo] / (K_d + [oligo])$  where initial FA is represented by  $FA_i$  and the overall change  
226 in FA is represented by  $B_{max}$ . Oligos: hRUNX1 5'UTR:  
227 CGCCCCCCCCACCCCCCGCAGUAAUAAAGGCCCCUGA, hRUNX1 5'UTR(mut)  
228 CGCGCGCGCGCACGCGCCGCGAGUAAUAAAGGCGCCUGA, hRUNX1 int5-6  
229 UCUCUUCCCUCCCUCCUCCCUCCCCCAU, hRUNX1 int5-6(mut)  
230 UCUGUUCGCUCGCUCGUUCGCUCGCGCCAU, mRunx1 int5-6  
231 UCCUCCUCCCUUCCCCUCCCGGUCCCUA, mRunx1 int5-6(mut)  
232 UCCUCCUCGCUUCGCCUCGCGGUCCCUA.

233 *Thermal shift assays:* Recombinant hnRNP K protein (Gallardo et al., 2019) was incubated with  
234 SYPRO orange dye in the presence of DNA oligos [the DNA equivalent to RNA oligos used in  
235 FA assays]. Samples were heated from 25°C to 99°C in PBS buffer and fluorescence measured  
236 at each temperature increment using a StepOne Plus Real Time PCR System (Applied  
237 Biosystem, Foster City, CA). Negative controls with no protein were run on each plate. The first  
238 derivative of fluorescence was calculated at each temperature and the temperature  
239 corresponding to the minima was designated as the melting temperature of the sample.

240 *RT-PCR for RUNX1 isoforms:* Equal amount of RNA per sample was converted to cDNA with  
241 iScript (BioRad, Hercules, CA). Standard PCR conditions were used to amplify cDNA using a  
242 BioRad Thermocycler at 95°C x 3 minutes, followed by 35 cycles of 95°C for 1 minute, 60°C for  
243 1 minute, and 72°C for 3 minutes, and finally 72°C for 5 minutes. After amplification, equal  
244 amounts of PCR products were run on a 2% agarose gel with ethidium bromide and visualized  
245 using a Syngene G:Box EF2 gel doc system with GENESys image capture software. Primers



246 (5' to 3'): hRUNX1 (exon 5) forward GAAGTGGGAAGAGGGAAAAGCTTCA, hRUNX1 (exon 7)  
247 reverse GCACGTCCAGGTGAAATGCG, hPPIA forward CCCACCGTGTTCTTCGACATT,  
248 hPPIA reverse GGACCCGTATGCTTTAGGATGA, mRunx1 (exon 5) forward  
249 CACTCTGACCATCACCGTCTT, mRunx1 (exon 7) reverse GGATCCCAGGTACTGGTAGGA,  
250 mPPIA forward GAGCTGTTTGCAGACAAAGTTC, mPPIA reverse  
251 CCCTGGCACATGAATCCTGG.

252 *Sanger Sequencing:* DNA was purified from agarose gels using a gel purification kit (Invitrogen,  
253 Carlsbad, CA). Sequencing was performed on an ABI 3730XL sequencer using BigDye  
254 terminator cycle sequencing chemistry with the forward primer used in the RT-PCR reaction.  
255 For validation, another sequencing run was performed with the reverse primer used in the RT-  
256 PCR reaction. Data was provided as text files and chromatograms.

257 *Clinical RUNX1 isoform expression analysis:* RNA-seq expression data for the full-length  
258 (ENST00000344691.8) and  $\Delta$ Ex6 (ENST00000399240.5) *RUNX1* isoforms and corresponding  
259 clinical data for 350 patients with AML from the BEAT AML 1.0 cohort was downloaded through  
260 the Vizome data portal (<https://vizome.org/>) February 2020 (Tyner et al., 2018).

261 *Protein stability assays:* 293T cells stably transduced with tetracycline-inducible constructs to  
262 overexpress *RUNX1*, either full-length or lacking exon 6. 400 ng/mL doxycycline was added to  
263 cells prior to the addition of cycloheximide (10  $\mu$ M, Sigma-Aldrich, St. Louis, MO) with or without  
264 MG-132 (10  $\mu$ M, SelleckChem, Houston, TX) for 1-8 hours. Cells were collected and lysed in  
265 NP40 lysis buffer with protease and phosphatase inhibitors prior to western blot.

266 *Transfections:* 293T cells were plated at identical confluencies and transfected using equal  
267 amounts of DNA with JetPrime reagents as per manufacturer's instructions (Polyplus  
268 Transfection, NY). All transfections were for 48 hours unless otherwise noted.

269 *Reporter assays:* The M-CSF promoter reporter (pMCSF-R-luc Addgene plasmid # 12420;  
270 <http://n2t.net/addgene:12420>; RRID: Addgene\_12420)(Zhang et al., 1994) was used to assess  
271 RUNX1 transcriptional activity. 293T cells were transiently transfected with luciferase-based  
272 reporter plasmids and expression plasmids using jetPRIME (Polyplus, New York, NY). Total  
273 DNA quantity was constant across all wells. 48 hours post-transfection, luciferase assay reagent  
274 was mixed in a 1:1 ratio with cell lysate (Luciferase Assay System kit, Promega, Madison, WI).  
275 Luciferase activity was measured with Synergy H4 Hybrid Reader (BioTek, Winooski, VT).  
276 Transfection efficiency for each well was normalized using 62.5ng of a pCMV  $\beta$ -galactosidase  
277 plasmid, which was co-expressed in each experiment.

## 278 **Results**

### 279 **hnRNP K is overexpressed in AML patient samples and correlates with poor clinical** 280 **outcomes**

281 We first assessed hnRNP K protein expression in AML using a publicly available reverse  
282 phase protein array (RPPA) dataset (Hu et al., 2019). While hnRNP K expression varied, AML  
283 cases had significantly higher median hnRNP K expression compared to healthy human bone  
284 marrow ( $p=0.0056$ , Fig 1A). As expected, a small percentage of cases had decreased hnRNP  
285 K expression, consistent with previous descriptions of *HNRNPK* haploinsufficiency  
286 corresponding with del(9q) (Gallardo et al., 2015; Kronke et al., 2013; Peniket et al., 2005).  
287 Increased hnRNP K expression was further associated with a statistically significant decrease in  
288 overall survival (OS; 24.3 months versus 48.7 months; HR 1.9; 95% CI 1.3-2.7; Figure 1B).  
289 Thus, stratification of patients based solely on hnRNP K overexpression was sufficient to  
290 elucidate a subset of patients with an inferior clinical outcome, suggesting that increased  
291 amounts of hnRNP K may be involved in the pathology of AML.

292 We considered the possibility that increased levels of hnRNP K could be a consequence of  
293 mutation. In line with the findings of others, a mere 2.9% of AML cases at our institution were

294 found to have an *HNRNP K* mutation (Supplemental Figure 1) (Cancer Genome Atlas Research  
295 et al., 2013; Papaemmanuil et al., 2016; Tyner et al., 2018). Given the discordance between  
296 this small mutational occurrence and the relatively large proportion of AML cases with elevated  
297 hnRNP K protein levels, we therefore posit that increased hnRNP K is of the wildtype form.

298

### 299 **hnRNP K overexpression impacts the differentiation potential of HSPCs**

300 To evaluate a possible role of hnRNP K overexpression in myeloid disease, we  
301 overexpressed wildtype hnRNP K in murine hematopoietic stem and progenitor cells (HSPCs).  
302 Robust overexpression of hnRNP K was observed at the protein level (Figure 2A). *In vitro*,  
303 hnRNP K-overexpressing cells exhibited a significant increase in colony formation ( $p=0.008$ ,  
304 Figures 2B-C), suggesting that elevated hnRNP K may influence self-renewal capacity of  
305 HSPCs. Flow cytometry revealed that hnRNP K-overexpressing colonies were composed of  
306 fewer Gr1<sup>+</sup>CD11b<sup>+</sup> mature myeloid cells compared to controls (Figures 2D-E). However,  
307 immature c-kit<sup>+</sup>Sca-1<sup>+</sup> cells were more prominent in hnRNP K-overexpressing colonies  
308 compared to controls (Figures 2D-E). These data suggested that hnRNP K overexpression  
309 hinders HSPC differentiation into mature myeloid cells and may be involved in myeloid  
310 leukemogenesis.

311

### 312 **Overexpression of wildtype hnRNP K is sufficient to drive myeloid disease in mice**

313 Because hnRNP K overexpression was observed in AML and correlated with poor clinical  
314 outcomes, we sought to directly evaluate if overexpression of wildtype hnRNP K was sufficient  
315 to drive myeloid disease. To this end, we injected murine HSPCs overexpressing wildtype  
316 hnRNP K or an empty vector control into sub-lethally irradiated NSG mice. Recipients of  
317 hnRNP K-overexpressing HSPCs had markedly shortened survival compared to recipients of  
318 control HSPCs (median survival 8.1 weeks versus median not reached (HR 3.0, 95% CI 1.2 –  
319 7.3,  $p=0.02$ ; Figure 3A), despite similar engraftment between groups (Figure 3B).

320 Analysis of peripheral blood revealed that recipients of hnRNP K-overexpressing HSPCs  
321 had modest leukocytosis (Supplemental Figure 2A), while hemoglobin and platelet counts were  
322 not significantly changed between groups (Supplemental Figures 2B-C). Therefore, hnRNP K-  
323 overexpression appears to selectively affect the leukocyte compartment in our murine model.  
324 Indeed, mature neutrophils were less abundant in peripheral blood of mice transplanted with  
325 hnRNP K-overexpressing HSPCs (Supplemental Figure 2D). While the percentage of circulating  
326 monocytes or eosinophils did not differ between groups (Supplemental Figures 2E-F), hnRNP  
327 K-overexpression caused a slight increase in lymphocytes (Supplemental Figure 2G).

328 Given the peripheral blood abnormalities, we next evaluated bone marrow. Recipients of  
329 hnRNP K-overexpressing HSPCs had more cellular bone marrow than control recipients (Figure  
330 3C). In addition, myeloid cells were overrepresented in bone marrow containing hnRNP K-  
331 overexpressing cells, and mild eosinophilia was observed (Figure 3C).

332 Given these abnormalities, we examined other hematopoietic organs. Splenomegaly was  
333 observed in recipients of hnRNP K-overexpressing HSPCs (Figure 3D-E) and histologic  
334 evaluation revealed starkly disrupted splenic architecture in recipients of hnRNP K-  
335 overexpressing HSPCs that corresponded with increased hnRNP K expression (Figure 3F).  
336 Immunohistochemistry on spleens from recipients of hnRNP K-overexpressing HSPCs showed  
337 CD34 and CD117 positive cells, indicating the presence of immature hematopoietic cells in this  
338 organ (Supplemental Figure 3A), which is in line with our observations from the colony formation  
339 assays.

340 Recipients of hnRNP K-overexpressing HSPCs also harbored infiltrations of leukocytes into  
341 the hepatic parenchyma that were not present in mice transplanted with empty vector-containing  
342 HSPCs (Supplemental Figure 3B). These hepatic infiltrates observed in recipients of hnRNP K-  
343 overexpressing HSPCs were largely negative for CD3, but positive for CD117, CD14, and  
344 myeloperoxidase (MPO; Supplemental Figure 3C), indicating that immature hematopoietic cells  
345 and cells of myeloid origin were present in this organ. Notably, lack of CD3 expression largely

346 ruled out a graft versus host effect. Taken together, these data indicate that hnRNP K  
347 overexpression in hematopoietic stem and progenitor cells is sufficient to drive fatal myeloid  
348 disease in mice.

349

### 350 **hnRNP K binds to and influences the alternative splicing of the *RUNX1* transcript**

351 Next, we wanted to understand a mechanistic basis for hnRNP K's influence on myeloid  
352 development. To this end, we performed RNA-Seq on hnRNP K-overexpressing HSPCs. In  
353 addition to differences in gene expression (Supplemental Figure 4A), we observed statistically  
354 significant changes in numerous RNA splicing events (Figure 4A). Given the RNA-binding  
355 properties of hnRNP K coupled with the increasing appreciation for altered splicing events in  
356 hematologic malignancies, we focused on differentially spliced genes. When we specifically  
357 evaluated hematopoietic genes that were differentially spliced in the context of hnRNP K  
358 overexpression, we identified *Runx1* as one of the most significantly differentially spliced genes  
359 (Figure 4B). This was a particularly intriguing finding, as *RUNX1* was also among the transcripts  
360 most significantly associated with hnRNP K in an hnRNP K RNA-immunoprecipitation dataset in  
361 a human AML cell line generated from our lab (GSE 126479; Figure 4C (Gallardo et al., 2019)).  
362 These data, as well as the well-described role of *RUNX1* as a critical mediator in many  
363 leukemias, led us to focus on studying this target.

364 While hnRNP K has been associated with *Runx1* splicing (Cao et al., 2012), this has not  
365 been described in the context of hnRNP K overexpression, nor has a direct interaction between  
366 hnRNP K and *Runx1* RNA been characterized. Therefore, we used our previously developed  
367 computer algorithm to identify putative hnRNP K binding sites within human *RUNX1* or mouse  
368 *Runx1* transcripts (Gallardo et al., 2019). Two putative hnRNP K binding sites were identified in  
369 human *RUNX1*— one near the 3' splice site of the intron 5-6 junction and one in the 5'  
370 untranslated region (UTR) of *RUNX1b/c* (Figure 4D). Notably, only the intron 5-6 site was

371 conserved in murine *Runx1*, which is consistent with a previous report of a similar site in the rat  
372 homolog (Cao et al., 2012).

373 To assess whether hnRNP K directly bound these sites in *RUNX1* RNA, we performed  
374 fluorescence anisotropy assays. Indeed, purified hnRNP K protein stringently bound the intron  
375 5-6 site in both human and mouse *RUNX1* (Figures 4E-F). hnRNP K also bound tightly to the  
376 predicted site in the 5' UTR of human *RUNX1* RNA (Supplemental Figure 4B). In all cases, the  
377 hnRNP K-*RUNX1* interaction was abrogated when the hnRNP K consensus binding site was  
378 mutated (Figures 4E-F, Supplementary Figure 4B), indicating that hnRNP K binds *RUNX1*  
379 directly and in a sequence-specific manner. These findings were confirmed in thermal shift  
380 assays, where hnRNP K was stabilized (i.e. had an increased melting temperature) in the  
381 presence of the conserved nucleic acid sequence corresponding to intron 5-6 in both human  
382 and murine *RUNX1* (Supplemental Figure 4C). As with the fluorescence anisotropy assays,  
383 mutations in the hnRNP K binding site diminished the ability of hnRNP K to be stabilized by  
384 these oligonucleotides (Supplemental Figure 4C).

385 Given the similarity between the hnRNP K binding site in *RUNX1* intron 5-6 in mouse and  
386 human, as well as RNA-Seq data identifying (Figure 4) that the *Runx1* splicing alterations  
387 surrounded exon 6, we focused our efforts on this site. Indeed, PCR amplification spanning  
388 exons 5 through 7 of *Runx1* in HSPCs validated the observations from RNA-Seq that an isoform  
389 of *Runx1* lacking exon 6 was enriched in hnRNP K-overexpressing HSPCs (Figure 5A). Sanger  
390 sequencing of a similar *RUNX1* PCR amplicon of exons 5-7 in human 293T cells further  
391 confirmed that the two PCR products amplified from this PCR contained exons 5-7 (referred to  
392 as FL *RUNX1*; 352 base pairs) or completely lacked exon 6 (referred to as *RUNX1* $\Delta$ Ex6; 192  
393 base pairs; Figure 5B). These results indicate that both *RUNX1* FL and *RUNX1* $\Delta$ Ex6 isoforms  
394 are present in both human and mouse.

395

396 **The *RUNX1ΔEx6* splice isoform is present in AML patient samples**

397 While these isoforms of *RUNX1* were present in human and mouse, we wanted to examine  
398 whether these were also present in human AML samples. Indeed, *RUNX1ΔEx6* was prominent  
399 in bone marrow and peripheral blood of patients with AML (Figure 5C). Analysis of publicly  
400 available data also corroborated the presence of this *RUNX1ΔEx6* in AML (Supplementary  
401 Figure 5A). This suggests that alterations in *RUNX1* splicing involving exon 6 inclusion are  
402 clinically evident and may be relevant.

403 **hnRNP K expression levels regulate the generation of the *RUNX1ΔEx6* splice isoform**

404 To explicitly understand how hnRNP K levels mediate this splicing event, we developed  
405 several inducible hnRNP K-overexpressing human leukemia cell lines (Supplemental Figure  
406 5B). In each case, cells that overexpressed hnRNP K had a relative enrichment of *RUNX1ΔEx6*  
407 at the expense of *RUNX1 FL* compared to cells expressing an empty vector control (Figure 5D).  
408 Strikingly, knockdown of hnRNP K induced the opposite effect, as cells transduced with  
409 sh*HNRNPK* had increased *RUNX1 FL* at the expense of *RUNX1ΔEx6* (Figure 5E and  
410 Supplementary Figure 5C). Importantly, re-introduction of hnRNP K into the sh*HNRNPK*-  
411 knockdown cells rescued the relative proportion of *RUNX1 FL* to *RUNX1ΔEx6* to near that of  
412 controls (Figure 5F and Supplementary Figure 5D). This indicates that inclusion or exclusion of  
413 *RUNX1* exon 6 is dependent on hnRNP K levels. Importantly, this observation extended to the  
414 protein expression of *RUNX1* as well, where the shorter isoform of *RUNX1* was detectable at  
415 higher levels in the presence of hnRNP K overexpression (Supplemental Figure 5E). In  
416 contrast, knockdown of hnRNP K resulted in a reduction in the expression of this shorter  
417 *RUNX1* isoform (Supplemental Figure 5F).

418

419 **The *RUNX1ΔEx6* splice isoform has differential protein stability and function**

420 Since hnRNP K overexpression leads to relative enrichment of *RUNX1ΔEx6*, we next  
421 sought to evaluate any functional consequences of lacking this exon. Cycloheximide chase  
422 assays, in cells with stable inducible expression of RUNX1 FL or RUNX1ΔEx6, demonstrated  
423 that RUNX1ΔEx6 was substantially more stable than RUNX1 FL, in line with previous  
424 observations (Figure 6A) (Komeno et al., 2014; Sun et al., 2020). This effect was almost  
425 completely abrogated by addition of MG132 (Figure 6B), indicating that exon 6 is a critical  
426 mediator of RUNX1 protein stability. This is consistent with reports that have identified  
427 ubiquitination sites in exon 6 of the RUNX1 protein (Biggs et al., 2006).

428 As RUNX1 is a well-defined transcription factor, we then queried whether lack of exon 6  
429 would affect the transcriptional capabilities of this protein. Indeed, luciferase assays indicated  
430 that RUNX1 FL and RUNX1ΔEx6 had differential abilities to transactivate a promoter-reporter  
431 derived from the CSF1R promoter, which is known to have RUNX1 binding sites (Figure 6C).  
432 Together, our data demonstrate that RUNX1 FL and RUNX1ΔEx6 are phenotypically and  
433 functionally distinct isoforms.

434 To understand whether this isoform of RUNX1 may be responsible, in part, for mediating the  
435 hnRNP K-overexpression phenotype, we repeated colony formation assays using HSPCs.  
436 HSPCs overexpressing RUNX1ΔEx6 formed significantly more colonies *in vitro* than HSPCs  
437 overexpressing RUNX1 FL or an empty vector (Figure 6D). This increase in colony formation  
438 was similar to that observed with overexpression of hnRNP K (Figure 2B-C), suggesting that  
439 increased expression of RUNX1ΔEx6 may be partly responsible for this hnRNP K-mediated  
440 effect.

441

442 **The KH3 RNA-binding domain of hnRNP K is required for the generation of the**  
443 ***RUNX1ΔEx6* splice isoform**



444 Given the striking splicing differences observed with hnRNP K overexpression in both  
445 human and mouse, we next set out to determine which domain of the hnRNP K protein was  
446 responsible for mediating this splicing event as this could expedite future drug discovery efforts.  
447 When hnRNP K was overexpressed, the relative proportion of *RUNX1 FL* to *RUNX1ΔEx6* was  
448 decreased, as we had observed in earlier studies (Figure 6E and Supplemental Figure 6B).  
449 However, when hnRNP K lacking either the KNS or KH3 domain was overexpressed, this effect  
450 was largely mitigated, and the *RUNX1* splicing pattern resembled control cells (Figure 6E and  
451 Supplemental Figure 6). This suggests that isolated domains of hnRNP K (KH3 and possibly  
452 KNS) are responsible for the splicing surrounding *RUNX1* exon 6. Given that the splicing  
453 process occurs in the nucleus and requires direct RNA-binding activity, it is therefore  
454 understandable why either the RNA-binding KH3 domain or the nuclear localization KNS  
455 domain would be critical.

456 Since the KH3 domain of hnRNP K appeared to be largely responsible for the expression of  
457 *RUNX1ΔEx6*, we overexpressed the isoform of hnRNP K lacking KH3 in HSPCs and performed  
458 colony formation assays. Strikingly, the absence of KH3 completely reversed the increase in  
459 colony formation associated with overexpression of full-length hnRNP K (Figure 6F). This  
460 demonstrates that the KH3 domain is critical not only for splicing surrounding exon 6 of *RUNX1*,  
461 but also that the KH3 domain is required for hnRNP K to exert its pro-growth activity in HSPCs.  
462 Taken together, these data demonstrate that the RNA-binding protein hnRNP K is highly  
463 expressed in AML. Overexpression of wildtype, unmutated hnRNP K increases colony  
464 formation potential of HSPCs, while inhibiting terminal differentiation. These findings are  
465 echoed *in vivo*, where increased hnRNP K expression leads to a fatal myeloid disease.  
466 Mechanistically, hnRNP K directly binds *RUNX1* RNA in mouse and in human, and its  
467 overexpression results in an enrichment of the phenotypically and functionally distinct isoform of  
468 *RUNX1* lacking exon 6 (*RUNX1ΔEx6*). Going forward, development of drugs to disrupt hnRNP

469 K's interaction with RNA, perhaps by specifically targeting the KH3 domain of hnRNP K, may  
470 have therapeutic potential in hnRNP K-overexpressing malignancies, including AML.

471

## 472 **Discussion**

473 RNA-binding proteins (RBPs) are increasingly being considered as essential molecules  
474 in regulating normal and malignant hematopoiesis. Spatio-temporal regulation of the gene  
475 targets of RBPs allows for the development and function of different hematological lineages  
476 (Kharas et al., 2010a; Wang et al., 2019). Consequently, aberrant function of RBPs, either due  
477 to mutations or altered expression, results in pathogenic states in the hematopoietic system  
478 (Barbieri et al., 2017; Gallardo et al., 2019; Kharas et al., 2010a; Vu et al., 2017). In this work,  
479 we describe overexpression of the RNA-binding protein, hnRNP K, in AML.

480 hnRNP K is frequently altered in malignancies and other disease states. Mutations in  
481 hnRNP K are relatively rare in hematological malignancies, as assessed by our patient cohort at  
482 MD Anderson Cancer Center (Supplemental Figure 1) and published work by other groups  
483 (Cancer Genome Atlas Research et al., 2013; Papaemmanuil et al., 2016; Tyner et al., 2018).  
484 Deletions of chromosome 9q, which encompass the *HNRNPK* locus at 9q21.32, are also rare  
485 events in AML (Gallardo et al., 2015; Kronke et al., 2013; Sweetser et al., 2005), but there has  
486 been sufficient evidence to establish the role of hnRNP K as a contextual haploinsufficient tumor  
487 suppressor. On the other hand, clinical and biological studies from our group and others have  
488 also identified that that *increased* hnRNP K expression may play a role in both hematologic  
489 malignancies and solid tumors (Barboro et al., 2009; Carpenter et al., 2006; Chen et al., 2010;  
490 Wen et al., 2010; Zhou et al., 2010). Indeed, increased expression of hnRNP K appears to be  
491 the more common occurrence in blood cancers (Figure 1A, (Gallardo et al., 2019)).

492 In the present work, using a previously published database, we observe that hnRNP K is  
493 overexpressed in patients with AML and correlates with poor clinical outcomes. Given the low  
494 prevalence of hnRNP K mutations in AML, we posit that it is the wildtype form of hnRNP K that

495 is overexpressed. Further, molecular mechanisms that underlie the overexpression of hnRNP K  
496 in AML remain an active area of investigation in our laboratory.

497 To evaluate the direct role of hnRNP K in driving myeloid phenotypes, we used a murine  
498 HSPC transplant model. Transplantation of hnRNP K-overexpressing HSPCs into mice results  
499 in a fatal myeloproliferative phenotype. The aberrant myelopoiesis observed in our mouse  
500 model is intriguing for several reasons. We recently described a mouse model wherein B-cell  
501 lymphomas develop secondary to hnRNP K overexpression in B-cells (Gallardo et al., 2019). In  
502 the current study, where hnRNP K was overexpressed in HSPCs, no lymphomas were  
503 observed. This suggests that hnRNP K overexpression earlier in hematopoiesis promotes a  
504 myeloid bias and/or inhibits lymphoid differentiation. Consistent with this, microarray data in  
505 human hematopoiesis has revealed *HNRNPK* transcript expression is higher in myeloid-biased  
506 compared to lymphoid-biased progenitor cells (Novershtern et al., 2011; Verhaak et al., 2009).  
507 In addition, we observed similar phenotypes including shortened survival and myeloid  
508 hyperplasia in mice that are haploinsufficient for *Hnrnpk* (Gallardo et al., 2019), suggesting that  
509 normal hematopoiesis, particularly of the myeloid lineage, requires exquisitely tight regulation of  
510 hnRNP K expression.

511 Mechanistic studies reveal that hnRNP K overexpression results in altered pre-mRNA  
512 splicing events. One of the top genes that was differentially spliced was *RUNX1*, and we  
513 decided to focus on altered splicing of the *RUNX1* transcript given its critical role in myeloid  
514 biology. Specifically, overexpression of hnRNP K resulted in the preferential splicing and  
515 generation of a *RUNX1* isoform lacking exon 6. Even a small increase in the levels of the  
516 *RUNX1ΔEx6* isoform is likely to be physiologically relevant, given the drastically increased  
517 stability of the corresponding protein. The *Runx1ΔEx6* isoform exhibits higher self-renewal  
518 capacity in colony formation assays, which is in agreement with the findings of Komeno et al  
519 and Sun et al (Komeno et al., 2014; Sun et al., 2020). In addition, others have demonstrated a

520 depletion in the cellular pool of HSCs *in vivo* in mice lacking the *RUNX1ΔEx6* isoform, indicating  
521 the importance of tight regulation of splicing in hematopoiesis (Ghanem et al., 2018; Komeno et  
522 al., 2014).

523         Functionally, we observed that the *RUNX1ΔEx6* isoform has different transcriptional  
524 activities compared to the full-length isoform. This may be attributed to the fact that the protein  
525 domain encoded by exon 6 is responsible for the interaction between *RUNX1* and the  
526 transcriptional co-repressor *SIN3A* (Zhao et al., 2008). The region encoded by exon 6 also  
527 contains arginine methylation sites, and these post-translational modifications have been  
528 implicated in regulation of transcriptional activity (Zhao et al., 2008). The exact mechanisms by  
529 which the *RUNX1ΔEx6* isoform is generated and the molecular processes that impart functional  
530 diversity to this alternatively spliced isoform remains an active area of investigation. However,  
531 given the robust presence of this isoform in AML patient samples, it is likely to have a role in  
532 AML biology.

533         Taken together, our data demonstrate the pathogenicity of overexpression of a wild type  
534 RBP, hnRNP K, in AML. While the altered splicing of the *RUNX1* transcript is observed upon  
535 hnRNP K overexpression, it is unlikely to be the sole mechanism driving the oncogenicity of  
536 hnRNP K. However, this paper provides evidence that aberrant expression of an RBP can  
537 disrupt splicing within the cell and has far reaching cellular implications, including but not limited  
538 to altered transcription factor activities.

539

#### 540 **Acknowledgements**

541 We would like to thank Kendra Allton, Sabrina Stratton, and other members of Dr. Michelle  
542 Barton's laboratory for helpful conversations, and Taghi Manshouri for technical assistance and  
543 collaborative efforts.

544

545 **Funding**

546 This study has been supported by funding from a National Cancer Institute Cancer Center  
547 Support grant (CA016672) to core facilities at MD Anderson Cancer Center. MJLA is a recipient  
548 of the Dr. John J. Kopchick Fellowship. This research has been aided by a grant from the Jane  
549 Coffin Childs Memorial Fund for Medical Research (PM), and the American Society of  
550 Hematology (PM), a National Cancer Institute/National Institutes of Health Award  
551 (R01CA207204, SMP), Leukemia and Lymphoma Society (6577–19, SMP).

552

553 **Disclosure of conflicts of interest**

554 The authors declare no conflict of interests.

555

556 **References**

557 Barbieri, I., Tzelepis, K., Pandolfini, L., Shi, J., Millan-Zambrano, G., Robson, S.C., Aspris, D.,  
558 Migliori, V., Bannister, A.J., Han, N., *et al.* (2017). Promoter-bound METTL3 maintains myeloid  
559 leukaemia by m(6)A-dependent translation control. *Nature* 552, 126-131.

560 Barboro, P., Repaci, E., Rubagotti, A., Salvi, S., Boccardo, S., Spina, B., Truini, M., Introini, C.,  
561 Puppo, P., Ferrari, N., *et al.* (2009). Heterogeneous nuclear ribonucleoprotein K: altered pattern  
562 of expression associated with diagnosis and prognosis of prostate cancer. *British journal of*  
563 *cancer* 100, 1608-1616.

564 Biggs, J.R., Peterson, L.F., Zhang, Y., Kraft, A.S., and Zhang, D.E. (2006). AML1/RUNX1  
565 phosphorylation by cyclin-dependent kinases regulates the degradation of AML1/RUNX1 by the  
566 anaphase-promoting complex. *Molecular and cellular biology* 26, 7420-7429.

567 Bray, N.L., Pimentel, H., Melsted, P., and Pachter, L. (2016). Near-optimal probabilistic RNA-  
568 seq quantification. *Nat Biotechnol* 34, 525-527.

569 Cancer Genome Atlas Research, N., Ley, T.J., Miller, C., Ding, L., Raphael, B.J., Mungall, A.J.,  
570 Robertson, A., Hoadley, K., Triche, T.J., Jr., Laird, P.W., *et al.* (2013). Genomic and epigenomic  
571 landscapes of adult de novo acute myeloid leukemia. *N Engl J Med* 368, 2059-2074.

572 Cao, W., Razanau, A., Feng, D., Lobo, V.G., and Xie, J. (2012). Control of alternative splicing  
573 by forskolin through hnRNP K during neuronal differentiation. *Nucleic acids research* 40, 8059-  
574 8071.

575 Carpenter, B., McKay, M., Dundas, S.R., Lawrie, L.C., Telfer, C., and Murray, G.I. (2006).  
576 Heterogeneous nuclear ribonucleoprotein K is over expressed, aberrantly localised and is  
577 associated with poor prognosis in colorectal cancer. *British journal of cancer* 95, 921-927.

- 578 Chen, L.C., Chung, I.C., Hsueh, C., Tsang, N.M., Chi, L.M., Liang, Y., Chen, C.C., Wang, L.J.,  
579 and Chang, Y.S. (2010). The antiapoptotic protein, FLIP, is regulated by heterogeneous nuclear  
580 ribonucleoprotein K and correlates with poor overall survival of nasopharyngeal carcinoma  
581 patients. *Cell Death Differ* 17, 1463-1473.
- 582 De Braekeleer, E., Douet-Guilbert, N., Morel, F., Le Bris, M.J., Ferec, C., and De Braekeleer, M.  
583 (2011). RUNX1 translocations and fusion genes in malignant hemopathies. *Future Oncol* 7, 77-  
584 91.
- 585 DiNardo, C.D., Stein, E.M., de Botton, S., Roboz, G.J., Altman, J.K., Mims, A.S., Swords, R.,  
586 Collins, R.H., Mannis, G.N., Pollyea, D.A., *et al.* (2018). Durable Remissions with Ivosidenib in  
587 IDH1-Mutated Relapsed or Refractory AML. *N Engl J Med* 378, 2386-2398.
- 588 Dohner, H., Weisdorf, D.J., and Bloomfield, C.D. (2015). Acute Myeloid Leukemia. *N Engl J*  
589 *Med* 373, 1136-1152.
- 590 Gallardo, M., Lee, H.J., Zhang, X., Bueso-Ramos, C., Pagon, L.R., McArthur, M., Multani, A.,  
591 Nazha, A., Manshouri, T., Parker-Thornburg, J., *et al.* (2015). hnRNP K Is a Haploinsufficient  
592 Tumor Suppressor that Regulates Proliferation and Differentiation Programs in Hematologic  
593 Malignancies. *Cancer cell* 28, 486-499.
- 594 Gallardo, M., Malaney, P., Aitken, M.J.L., Zhang, X., Link, T.M., Shah, V., Alybayev, S., Wu,  
595 M.H., Pagon, L.R., Ma, H., *et al.* (2019). Uncovering the role of hnRNP K, an RNA-binding  
596 protein, in B-cell lymphomas. *J Natl Cancer Inst.*
- 597 Ghanem, L.R., Kromer, A., Silverman, I.M., Ji, X., Gazzara, M., Nguyen, N., Aguilar, G.,  
598 Martinelli, M., Barash, Y., and Lieber, S.A. (2018). Poly(C)-Binding Protein Pcbp2 Enables  
599 Differentiation of Definitive Erythropoiesis by Directing Functional Splicing of the Runx1  
600 Transcript. *Molecular and cellular biology* 38.
- 601 Ghozi, M.C., Bernstein, Y., Negreanu, V., Levanon, D., and Groner, Y. (1996). Expression of the  
602 human acute myeloid leukemia gene AML1 is regulated by two promoter regions. *Proceedings*  
603 *of the National Academy of Sciences of the United States of America* 93, 1935-1940.
- 604 Graubert, T.A., Shen, D., Ding, L., Okeyo-Owuor, T., Lunn, C.L., Shao, J., Krysiak, K., Harris,  
605 C.C., Koboldt, D.C., Larson, D.E., *et al.* (2011). Recurrent mutations in the U2AF1 splicing  
606 factor in myelodysplastic syndromes. *Nat Genet* 44, 53-57.
- 607 Ho, S.N., Hunt, H.D., Horton, R.M., Pullen, J.K., and Pease, L.R. (1989). Site-directed  
608 mutagenesis by overlap extension using the polymerase chain reaction. *Gene* 77, 51-59.
- 609 Hu, C.W., Qiu, Y., Ligeralde, A., Raybon, A.Y., Yoo, S.Y., Coombes, K.R., Qutub, A.A., and  
610 Kornblau, S.M. (2019). A quantitative analysis of heterogeneities and hallmarks in acute  
611 myelogenous leukaemia. *Nat Biomed Eng* 3, 889-901.
- 612 Juliusson, G., Antunovic, P., Derolf, A., Lehmann, S., Mollgard, L., Stockelberg, D., Tidefelt, U.,  
613 Wahlin, A., and Hoglund, M. (2009). Age and acute myeloid leukemia: real world data on  
614 decision to treat and outcomes from the Swedish Acute Leukemia Registry. *Blood* 113, 4179-  
615 4187.

- 616 Kharas, M.G., Lengner, C.J., Al-Shahrour, F., Bullinger, L., Ball, B., Zaidi, S., Morgan, K., Tam,  
617 W., Paktinat, M., and Okabe, R. (2010a). Musashi-2 regulates normal hematopoiesis and  
618 promotes aggressive myeloid leukemia. *Nature medicine* 16, 903-908.
- 619 Kharas, M.G., Lengner, C.J., Al-Shahrour, F., Bullinger, L., Ball, B., Zaidi, S., Morgan, K., Tam,  
620 W., Paktinat, M., Okabe, R., *et al.* (2010b). Musashi-2 regulates normal hematopoiesis and  
621 promotes aggressive myeloid leukemia. *Nat Med* 16, 903-908.
- 622 Komeno, Y., Yan, M., Matsuura, S., Lam, K., Lo, M.C., Huang, Y.J., Tenen, D.G., Downing,  
623 J.R., and Zhang, D.E. (2014). Runx1 exon 6-related alternative splicing isoforms differentially  
624 regulate hematopoiesis in mice. *Blood* 123, 3760-3769.
- 625 Kronke, J., Bullinger, L., Teleanu, V., Tschurtz, F., Gaidzik, V.I., Kuhn, M.W., Rucker, F.G.,  
626 Holzmann, K., Paschka, P., Kapp-Schworer, S., *et al.* (2013). Clonal evolution in relapsed  
627 NPM1-mutated acute myeloid leukemia. *Blood* 122, 100-108.
- 628 Minuesa, G., Albanese, S.K., Xie, W., Kazansky, Y., Worroll, D., Chow, A., Schurer, A., Park,  
629 S.M., Rotsides, C.Z., Taggart, J., *et al.* (2019). Small-molecule targeting of MUSASHI RNA-  
630 binding activity in acute myeloid leukemia. *Nat Commun* 10, 2691.
- 631 Miyoshi, H., Ohira, M., Shimizu, K., Mitani, K., Hirai, H., Imai, T., Yokoyama, K., Soeda, E., and  
632 Ohki, M. (1995). Alternative splicing and genomic structure of the AML1 gene involved in acute  
633 myeloid leukemia. *Nucleic acids research* 23, 2762-2769.
- 634 Naviaux, R.K., Costanzi, E., Haas, M., and Verma, I.M. (1996). The pCL vector system: rapid  
635 production of helper-free, high-titer, recombinant retroviruses. *J Virol* 70, 5701-5705.
- 636 Novershtern, N., Subramanian, A., Lawton, L.N., Mak, R.H., Haining, W.N., McConkey, M.E.,  
637 Habib, N., Yosef, N., Chang, C.Y., Shay, T., *et al.* (2011). Densely interconnected transcriptional  
638 circuits control cell states in human hematopoiesis. *Cell* 144, 296-309.
- 639 Osato, M. (2004). Point mutations in the RUNX1/AML1 gene: another actor in RUNX leukemia.  
640 *Oncogene* 23, 4284-4296.
- 641 Osato, M., Asou, N., Abdalla, E., Hoshino, K., Yamasaki, H., Okubo, T., Suzushima, H.,  
642 Takatsuki, K., Kanno, T., Shigesada, K., *et al.* (1999). Biallelic and heterozygous point  
643 mutations in the runt domain of the AML1/PEBP2alphaB gene associated with myeloblastic  
644 leukemias. *Blood* 93, 1817-1824.
- 645 Papaemmanuil, E., Cazzola, M., Boultonwood, J., Malcovati, L., Vyas, P., Bowen, D., Pellagatti,  
646 A., Wainscoat, J.S., Hellstrom-Lindberg, E., Gambacorti-Passerini, C., *et al.* (2011). Somatic  
647 SF3B1 mutation in myelodysplasia with ring sideroblasts. *N Engl J Med* 365, 1384-1395.
- 648 Papaemmanuil, E., Dohner, H., and Campbell, P.J. (2016). Genomic Classification in Acute  
649 Myeloid Leukemia. *N Engl J Med* 375, 900-901.
- 650 Peniket, A., Wainscoat, J., Side, L., Daly, S., Kusec, R., Buck, G., Wheatley, K., Walker, H.,  
651 Chatters, S., Harrison, C., *et al.* (2005). Del (9q) AML: clinical and cytological characteristics  
652 and prognostic implications. *British journal of haematology* 129, 210-220.



- 653 Perl, A.E., Martinelli, G., Cortes, J.E., Neubauer, A., Berman, E., Paolini, S., Montesinos, P.,  
654 Baer, M.R., Larson, R.A., Ustun, C., *et al.* (2019). Gilteritinib or Chemotherapy for Relapsed or  
655 Refractory FLT3-Mutated AML. *N Engl J Med* 381, 1728-1740.
- 656 Pimentel, H., Bray, N.L., Puente, S., Melsted, P., and Pachter, L. (2017). Differential analysis of  
657 RNA-seq incorporating quantification uncertainty. *Nat Methods* 14, 687-690.
- 658 Saha, S., Murmu, K.C., Biswas, M., Chakraborty, S., Basu, J., Madhulika, S., Kolapalli, S.P.,  
659 Chauhan, S., Sengupta, A., and Prasad, P. (2019). Transcriptomic Analysis Identifies RNA  
660 Binding Proteins as Putative Regulators of Myelopoiesis and Leukemia. *Front Oncol* 9, 692.
- 661 Sanjabi, S., Williams, K.J., Sacconi, S., Zhou, L., Hoffmann, A., Ghosh, G., Gerondakis, S.,  
662 Natoli, G., and Smale, S.T. (2005). A c-Rel subdomain responsible for enhanced DNA-binding  
663 affinity and selective gene activation. *Genes & development* 19, 2138-2151.
- 664 Schmitt, C.A., Fridman, J.S., Yang, M., Baranov, E., Hoffman, R.M., and Lowe, S.W. (2002).  
665 Dissecting p53 tumor suppressor functions in vivo. *Cancer cell* 1, 289-298.
- 666 Seiler, M., Yoshimi, A., Darman, R., Chan, B., Keaney, G., Thomas, M., Agrawal, A.A., Caleb,  
667 B., Csibi, A., Sean, E., *et al.* (2018). H3B-8800, an orally available small-molecule splicing  
668 modulator, induces lethality in spliceosome-mutant cancers. *Nat Med* 24, 497-504.
- 669 Slovak, M.L., Kopecky, K.J., Cassileth, P.A., Harrington, D.H., Theil, K.S., Mohamed, A.,  
670 Paietta, E., Willman, C.L., Head, D.R., Rowe, J.M., *et al.* (2000). Karyotypic analysis predicts  
671 outcome of preremission and postremission therapy in adult acute myeloid leukemia: a  
672 Southwest Oncology Group/Eastern Cooperative Oncology Group Study. *Blood* 96, 4075-4083.
- 673 Stein, E.M., DiNardo, C.D., Fathi, A.T., Pollyea, D.A., Stone, R.M., Altman, J.K., Roboz, G.J.,  
674 Patel, M.R., Collins, R., Flinn, I.W., *et al.* (2019). Molecular remission and response patterns in  
675 patients with mutant-IDH2 acute myeloid leukemia treated with enasidenib. *Blood* 133, 676-687.
- 676 Stewart, S.A., Dykxhoorn, D.M., Palliser, D., Mizuno, H., Yu, E.Y., An, D.S., Sabatini, D.M.,  
677 Chen, I.S., Hahn, W.C., Sharp, P.A., *et al.* (2003). Lentivirus-delivered stable gene silencing by  
678 RNAi in primary cells. *RNA* 9, 493-501.
- 679 Stone, R.M., Mandrekar, S.J., Sanford, B.L., Laumann, K., Geyer, S., Bloomfield, C.D., Thiede,  
680 C., Prior, T.W., Dohner, K., Marcucci, G., *et al.* (2017). Midostaurin plus Chemotherapy for  
681 Acute Myeloid Leukemia with a FLT3 Mutation. *N Engl J Med* 377, 454-464.
- 682 Sugimura, R., Jha, D.K., Han, A., Soria-Valles, C., da Rocha, E.L., Lu, Y.F., Goettel, J.A.,  
683 Serrao, E., Rowe, R.G., Malleshiah, M., *et al.* (2017). Haematopoietic stem and progenitor  
684 cells from human pluripotent stem cells. *Nature* 545, 432-438.
- 685 Sun, W., Zeng, J., Chang, J., Xue, Y., Zhang, Y., Pan, X., Zhou, Y., Lai, M., Bian, G., Zhou, Q.,  
686 *et al.* (2020). RUNX1-205, a novel splice variant of the human RUNX1 gene, has blockage  
687 effect on mesoderm-hemogenesis transition and promotion effect during the late stage of  
688 hematopoiesis. *J Mol Cell Biol* 12, 386-396.
- 689 Sweetser, D.A., Peniket, A.J., Haaland, C., Blomberg, A.A., Zhang, Y., Zaidi, S.T., Dayyani, F.,  
690 Zhao, Z., Heerema, N.A., Boulwood, J., *et al.* (2005). Delineation of the minimal commonly



- 691 deleted segment and identification of candidate tumor-suppressor genes in del(9q) acute  
692 myeloid leukemia. *Genes Chromosomes Cancer* **44**, 279-291.
- 693 Tanaka, T., Tanaka, K., Ogawa, S., Kurokawa, M., Mitani, K., Nishida, J., Shibata, Y., Yazaki,  
694 Y., and Hirai, H. (1995). An acute myeloid leukemia gene, AML1, regulates hemopoietic myeloid  
695 cell differentiation and transcriptional activation antagonistically by two alternative spliced forms.  
696 *EMBO J* **14**, 341-350.
- 697 Tyner, J.W., Tognon, C.E., Bottomly, D., Wilmot, B., Kurtz, S.E., Savage, S.L., Long, N.,  
698 Schultz, A.R., Traer, E., Abel, M., *et al.* (2018). Functional genomic landscape of acute myeloid  
699 leukaemia. *Nature* **562**, 526-531.
- 700 Verhaak, R.G., Wouters, B.J., Erpelinck, C.A., Abbas, S., Beverloo, H.B., Lugthart, S.,  
701 Lowenberg, B., Delwel, R., and Valk, P.J. (2009). Prediction of molecular subtypes in acute  
702 myeloid leukemia based on gene expression profiling. *Haematologica* **94**, 131-134.
- 703 Vu, L.P., Pickering, B.F., Cheng, Y., Zaccara, S., Nguyen, D., Minuesa, G., Chou, T., Chow, A.,  
704 Saletore, Y., MacKay, M., *et al.* (2017). The N(6)-methyladenosine (m(6)A)-forming enzyme  
705 METTL3 controls myeloid differentiation of normal hematopoietic and leukemia cells. *Nat Med*  
706 **23**, 1369-1376.
- 707 Wang, E., Lu, S.X., Pastore, A., Chen, X., Imig, J., Chun-Wei Lee, S., Hockemeyer, K.,  
708 Ghebrechristos, Y.E., Yoshimi, A., Inoue, D., *et al.* (2019). Targeting an RNA-Binding Protein  
709 Network in Acute Myeloid Leukemia. *Cancer cell* **35**, 369-384 e367.
- 710 Wen, F., Shen, A., Shanas, R., Bhattacharyya, A., Lian, F., Hostetter, G., and Shi, J. (2010).  
711 Higher expression of the heterogeneous nuclear ribonucleoprotein k in melanoma. *Ann Surg*  
712 *Oncol* **17**, 2619-2627.
- 713 Yoshida, K., Sanada, M., Shiraishi, Y., Nowak, D., Nagata, Y., Yamamoto, R., Sato, Y., Sato-  
714 Otsubo, A., Kon, A., Nagasaki, M., *et al.* (2011). Frequent pathway mutations of splicing  
715 machinery in myelodysplasia. *Nature* **478**, 64-69.
- 716 Zhang, D.E., Hetherington, C.J., Chen, H.M., and Tenen, D.G. (1994). The macrophage  
717 transcription factor PU.1 directs tissue-specific expression of the macrophage colony-stimulating  
718 factor receptor. *Molecular and cellular biology* **14**, 373-381.
- 719 Zhao, X., Jankovic, V., Gural, A., Huang, G., Pardanani, A., Menendez, S., Zhang, J., Dunne,  
720 R., Xiao, A., Erdjument-Bromage, H., *et al.* (2008). Methylation of RUNX1 by PRMT1 abrogates  
721 SIN3A binding and potentiates its transcriptional activity. *Genes & development* **22**, 640-653.
- 722 Zhou, R., Shanas, R., Nelson, M.A., Bhattacharyya, A., and Shi, J. (2010). Increased  
723 expression of the heterogeneous nuclear ribonucleoprotein K in pancreatic cancer and its  
724 association with the mutant p53. *International journal of cancer* **126**, 395-404.
- 725 Zuber, J., Radtke, I., Pardee, T.S., Zhao, Z., Rappaport, A.R., Luo, W., McCurrach, M.E., Yang,  
726 M.M., Dolan, M.E., Kogan, S.C., *et al.* (2009). Mouse models of human AML accurately predict  
727 chemotherapy response. *Genes & development* **23**, 877-889.  
728
- 729

730

731 **Figure legends**

732

733 Figure 1: hnRNP K expression in *de novo* AML. (A) Relative hnRNP K protein expression as  
734 quantified by RPPA. CD34+ cells from healthy human donor bone marrows (n=10) are  
735 indicated in black. Cells from bone marrows of patients with AML (n=205) are shown in red. (C)  
736 Overall survival of AML patients with either high hnRNP K protein expression as determined by  
737 RPPA (red; n=45) or normal/low hnRNP K expression (blue; n=160). Data is publicly available  
738 at [www.leukemiaatlas.org](http://www.leukemiaatlas.org).

739

740 Figure 2: hnRNP K overexpression in murine HSPCs. (A) Western blot showing hnRNP K  
741 protein levels in HSPCs infected with empty vector or hnRNP K plasmids. (B) Representative  
742 brightfield images of colonies from HSPCs infected with empty vector or hnRNP K plasmid.  
743 Scale bar represents 500  $\mu$ m. (C) Bar graph quantitating the number of colonies per well in  
744 HSPCs infected with empty vector (n=14) and hnRNP K plasmids (n=10). (D) Flow cytometry  
745 analysis of HSPCs infected with empty vector and hnRNP K plasmids. (E) Bar graph  
746 quantitating the percentage of Gr1+CD11b+ and c-kit+Sca-1+ cells in HSPCs infected with  
747 empty vector (n=4) and hnRNP K plasmid (n=4).

748

749 Figure 3: Phenotypes observed in mice transplanted with hnRNP K overexpressing HSPCs. (A)  
750 Kaplan-Meier curves indicating survival of mice transplanted with HSPCs infected with an empty  
751 vector (n=13) and hnRNP K overexpression plasmid (n=22). Expression levels for hnRNP K in  
752 the HSPCs is depicted in the inset. (B) Percent donor cells in the peripheral blood of mice  
753 transplanted with HSPCs. (C) H&E staining in bone marrow samples obtained from mice  
754 transplanted with empty vector and hnRNP K overexpressing HSPCs. The scale bar represents  
755 50  $\mu$ m. (D) Representative photos of spleens from mice transplanted with empty vector and

756 hnRNP K overexpressing HSPCs. (E) Bar graph depicting spleen weights from mice  
757 transplanted with empty vector (n=12) and hnRNP K overexpressing (n=21) HSPCs. (F) H&E  
758 and immunohistochemical analyses for hnRNP K in spleen samples from mice transplanted with  
759 empty vector or hnRNP K overexpressing HSPCs. The scale bar represents 200  $\mu$ m.

760

761 Figure 4: Mechanistic basis for the oncogenicity of hnRNP K. (A) Volcano plot indicating  
762 alternatively spliced transcripts in HSPCs infected with empty vector (n=3) and hnRNP K  
763 plasmid (n=3). (B) Graph depicting differentially spliced transcripts in HSPCs infected with  
764 hnRNP K plasmid compared to empty vector, subsetted by causal implication in heme  
765 malignancies. (C) Graph depicting hnRNP K-associated transcripts, as determined by fRIP  
766 analysis, subsetted by causal implication in heme malignancies. The fRIP-Seq experiments  
767 were previously performed in the laboratory in triplicate in OCI-AML3 cells. (D) Identification of  
768 putative hnRNP K binding sites in the human and murine *RUNX1* transcripts using a previously  
769 generated computer algorithm. (E & F) Fluorescence anisotropy binding curves for purified full-  
770 length hnRNP K with FAM-labeled human and murine RUNX intron 5-6 wild-type and mutant  
771 oligos. Binding assays were performed in triplicate.

772

773 Figure 5: Assessing hnRNP K's impact on *RUNX1* alternative splicing. (A) RT-PCR based  
774 splicing analysis for *RUNX1* full-length and  $\Delta$ Ex6 isoforms in HSPCs infected with empty vector  
775 or hnRNP K plasmid. *Gapdh* was used as a loading control. (B) RT-PCR splicing analysis for  
776 *RUNX1* full-length and  $\Delta$ Ex6 isoforms in 293T cells followed by Sanger sequencing to confirm  
777 the sequences of the splice isoforms under study. (C) RT-PCR based splicing analysis for  
778 *RUNX1* full-length and  $\Delta$ Ex6 isoforms in peripheral blood and bone marrow cells obtained from  
779 healthy controls or AML patients. *PPIA* was used as a loading control. (D) RT-PCR based  
780 splicing analysis for *RUNX1* full-length and  $\Delta$ Ex6 isoforms in stable cell lines (K562, OCI-AML3,

781 THP1) that overexpress hnRNP K. *PPIA* was used as a loading control. (E) RT-PCR based  
782 splicing analysis for *RUNX1* full-length and  $\Delta$ Ex6 isoforms in K562 stable cell lines with shRNA-  
783 mediated hnRNP K knockdown. One shRNA targets the hnRNP K CDS (Ex10) and two hairpins  
784 target the 3'-UTR (Ex16-1 and Ex16-2). *PPIA* was used as a loading control. (F) RT-PCR  
785 based splicing analysis for *RUNX1* full-length and  $\Delta$ Ex6 isoforms in K562 stable cell lines with  
786 shRNA-mediated hnRNP K knockdown rescued with hnRNP K overexpression. *PPIA* was used  
787 as a loading control.

788

789 Figure 6: Functional relevance of the *RUNX*  $\Delta$ Ex6 splice isoform. (A) Immunoblot for RUNX1  
790 following a cycloheximide chase experiment in 293T cells that stably express *RUNX1* full-length  
791 or RUNX  $\Delta$ Ex6. HSP90 serves as the loading control. (B) Immunoblot for RUNX1 following  
792 cycloheximide+MG132 treatment in 293T cells that stably express *RUNX1* full-length or RUNX  
793  $\Delta$ Ex6. HSP90 serves as the loading control. (C) Luciferase-based reporter assay to assess  
794 transactivation from a CSF-1R promoter reporter in 293T cells. The experiment was  
795 independently done three times in triplicate. (D) Bar graph representing number of colonies  
796 formed per well for HSPCs infected with empty vector (n=7), *RUNX1* full-length (n=4) or RUNX  
797  $\Delta$ Ex6 (n=4) plasmid. (E) RT-PCR based splicing assay (in 293T cells) to determine the impact of  
798 different hnRNP K protein domains in regulating RUNX1 alternative splicing. (F) Bar graph  
799 representing number of colonies formed per well for HSPCs infected with empty vector (n=7),  
800 hnRNP K (n=7) or hnRNP K  $\Delta$ KH3 (n=3) plasmid.

801

802

803

804

bioRxiv preprint doi: <https://doi.org/10.1101/2021.02.05.429385>; this version posted February 6, 2021. The copyright holder for this preprint (which was not certified by peer review) is the author/funder. All rights reserved. No reuse allowed without permission.

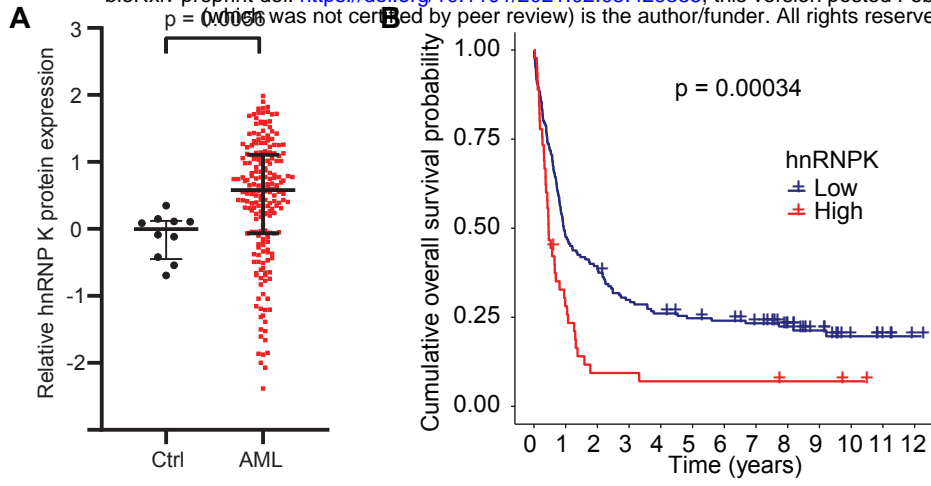

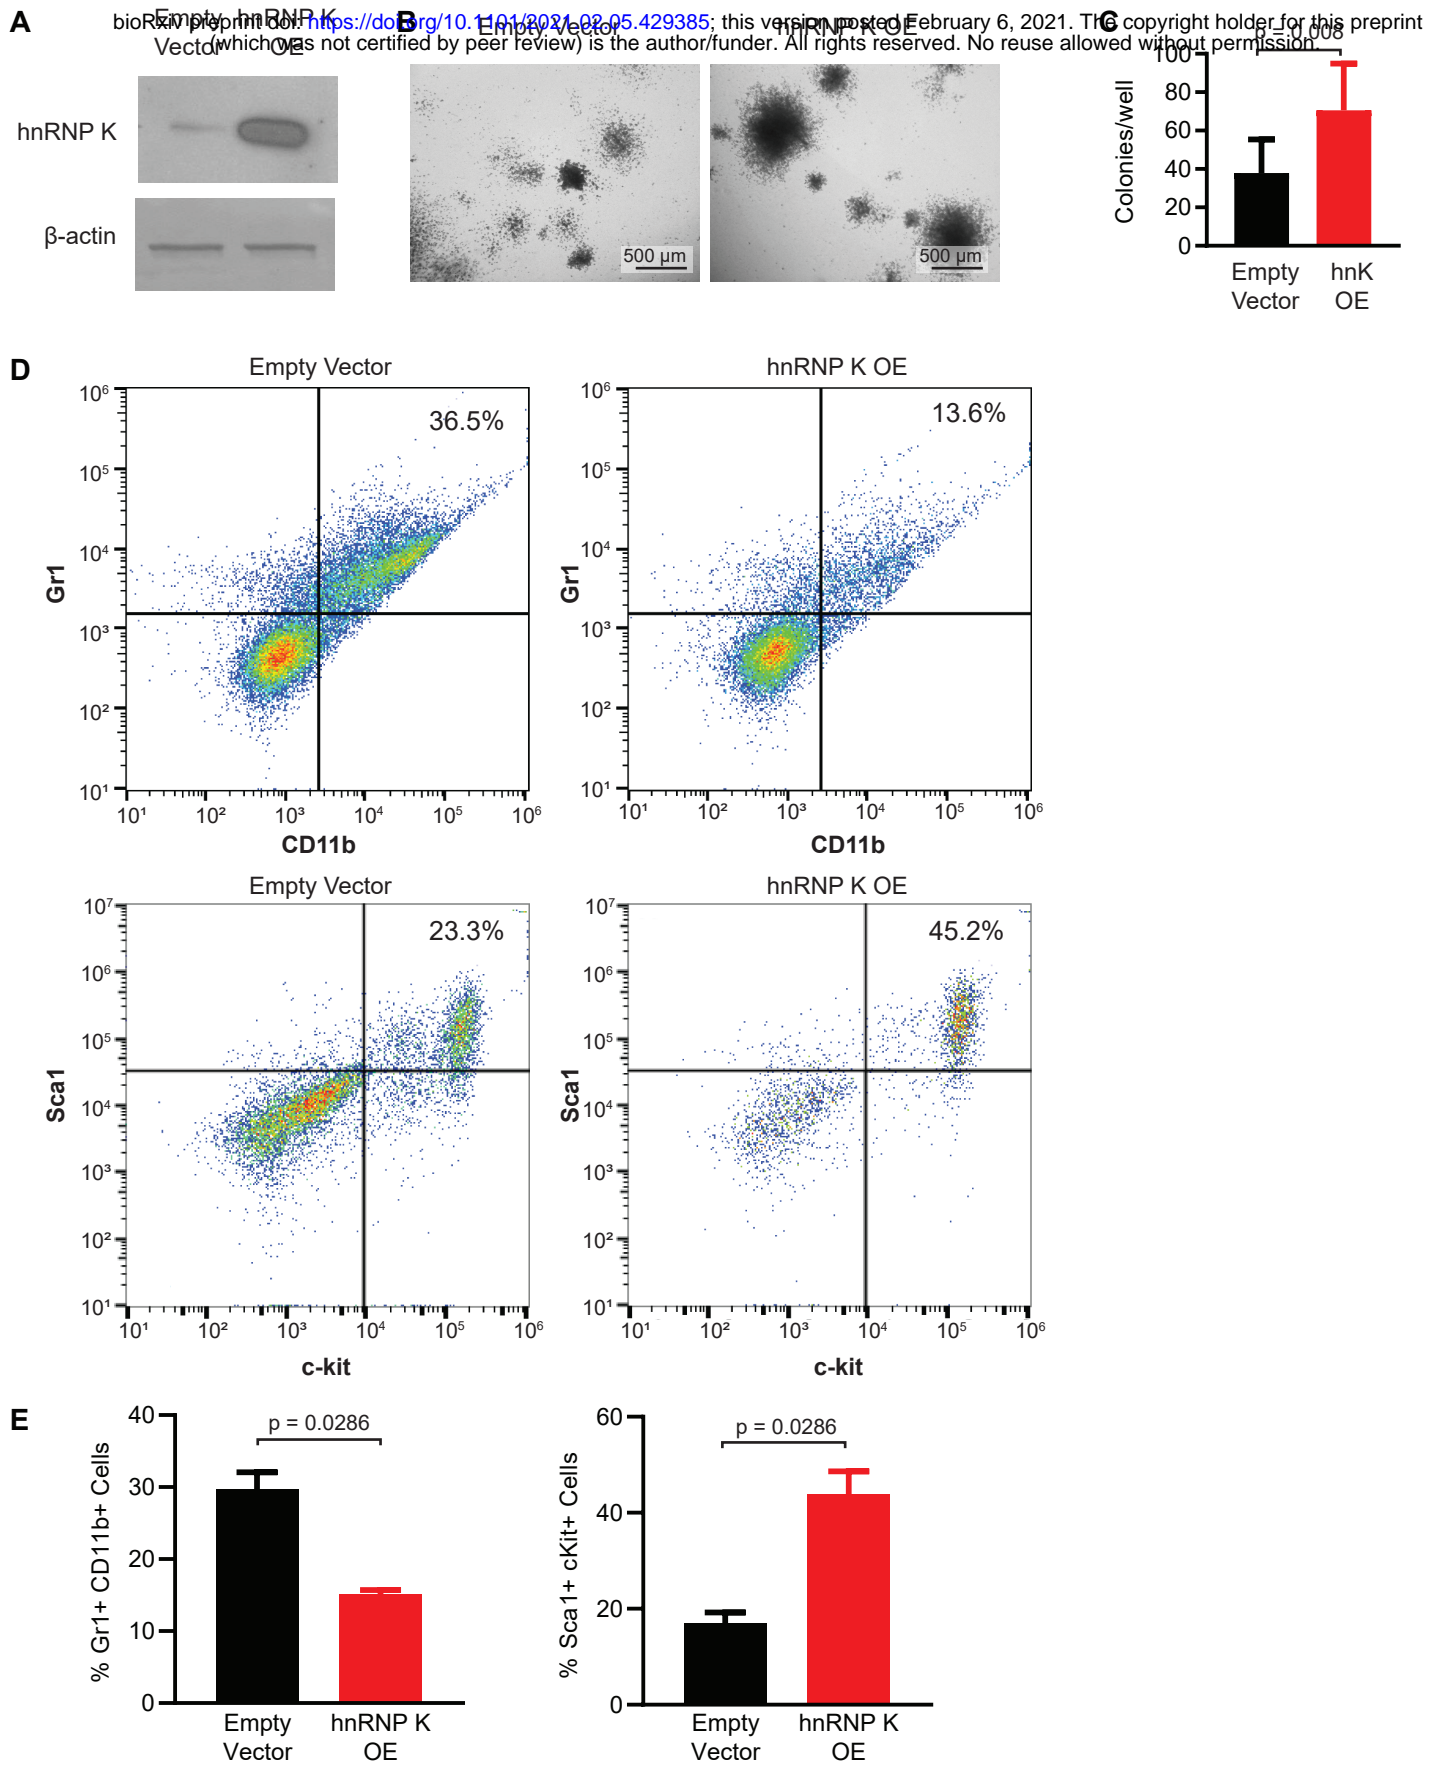



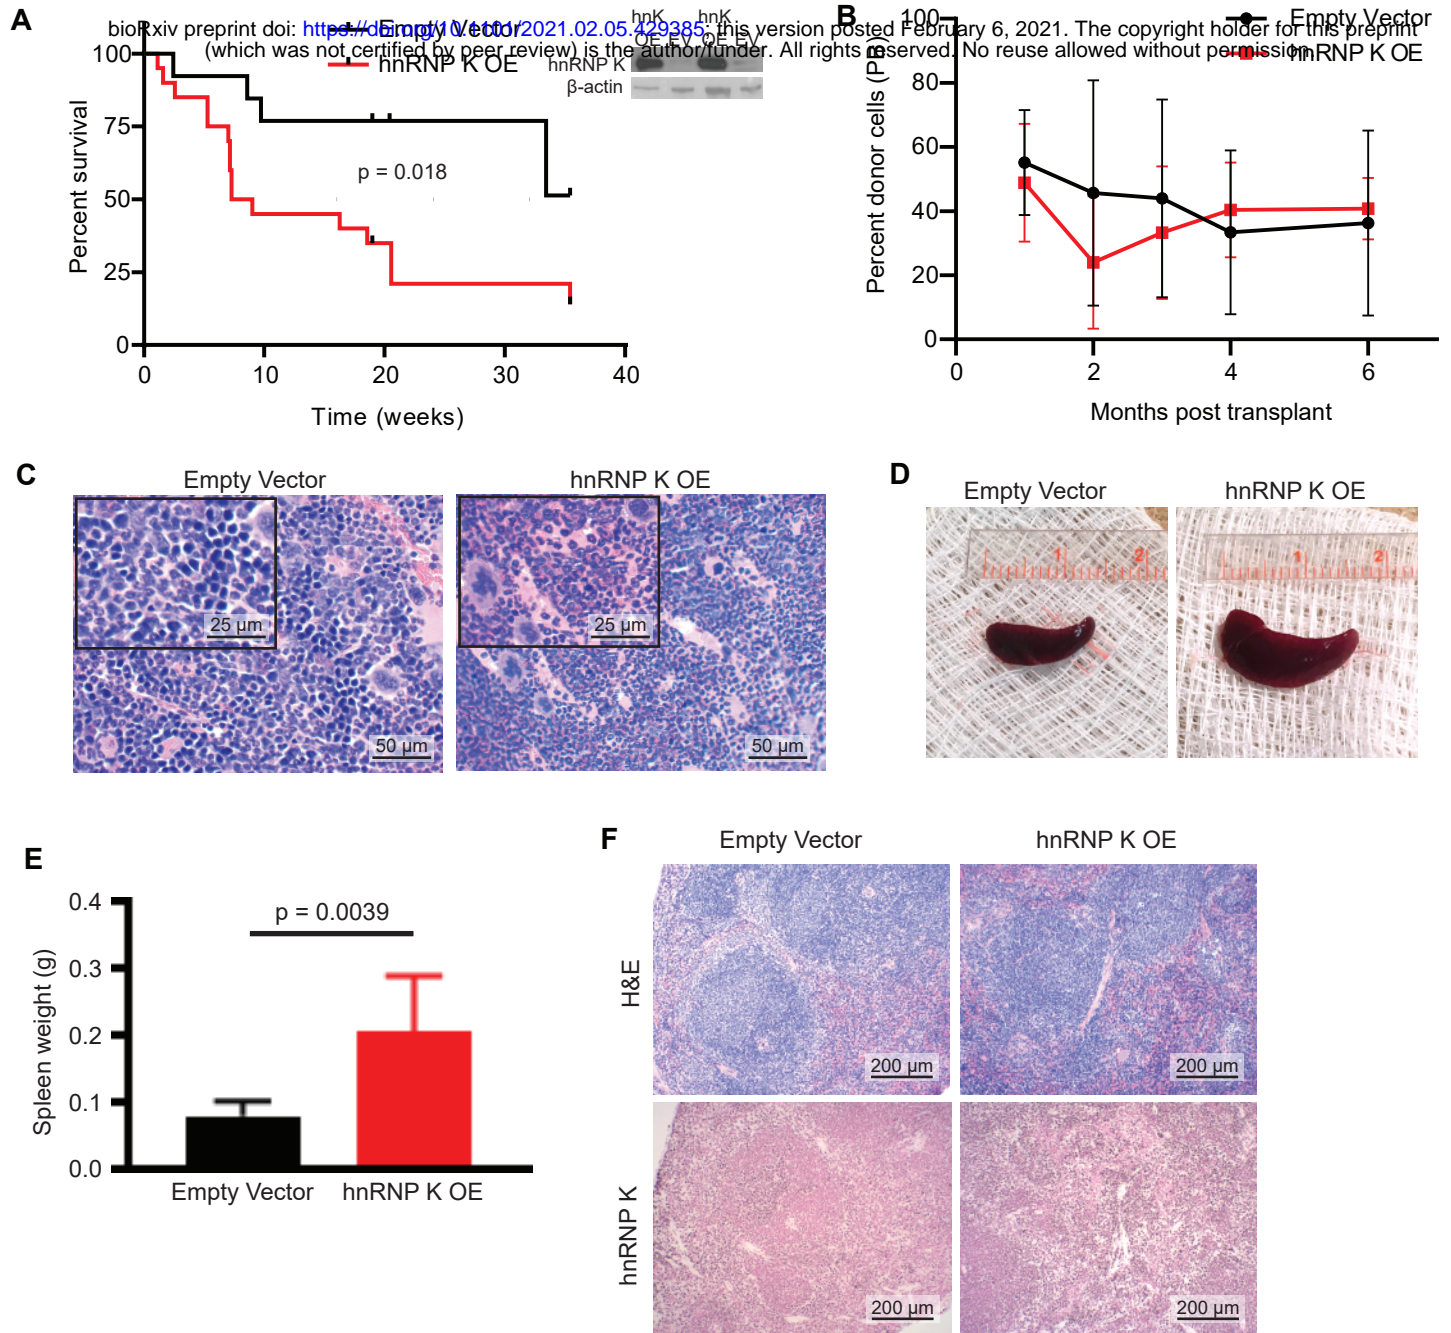

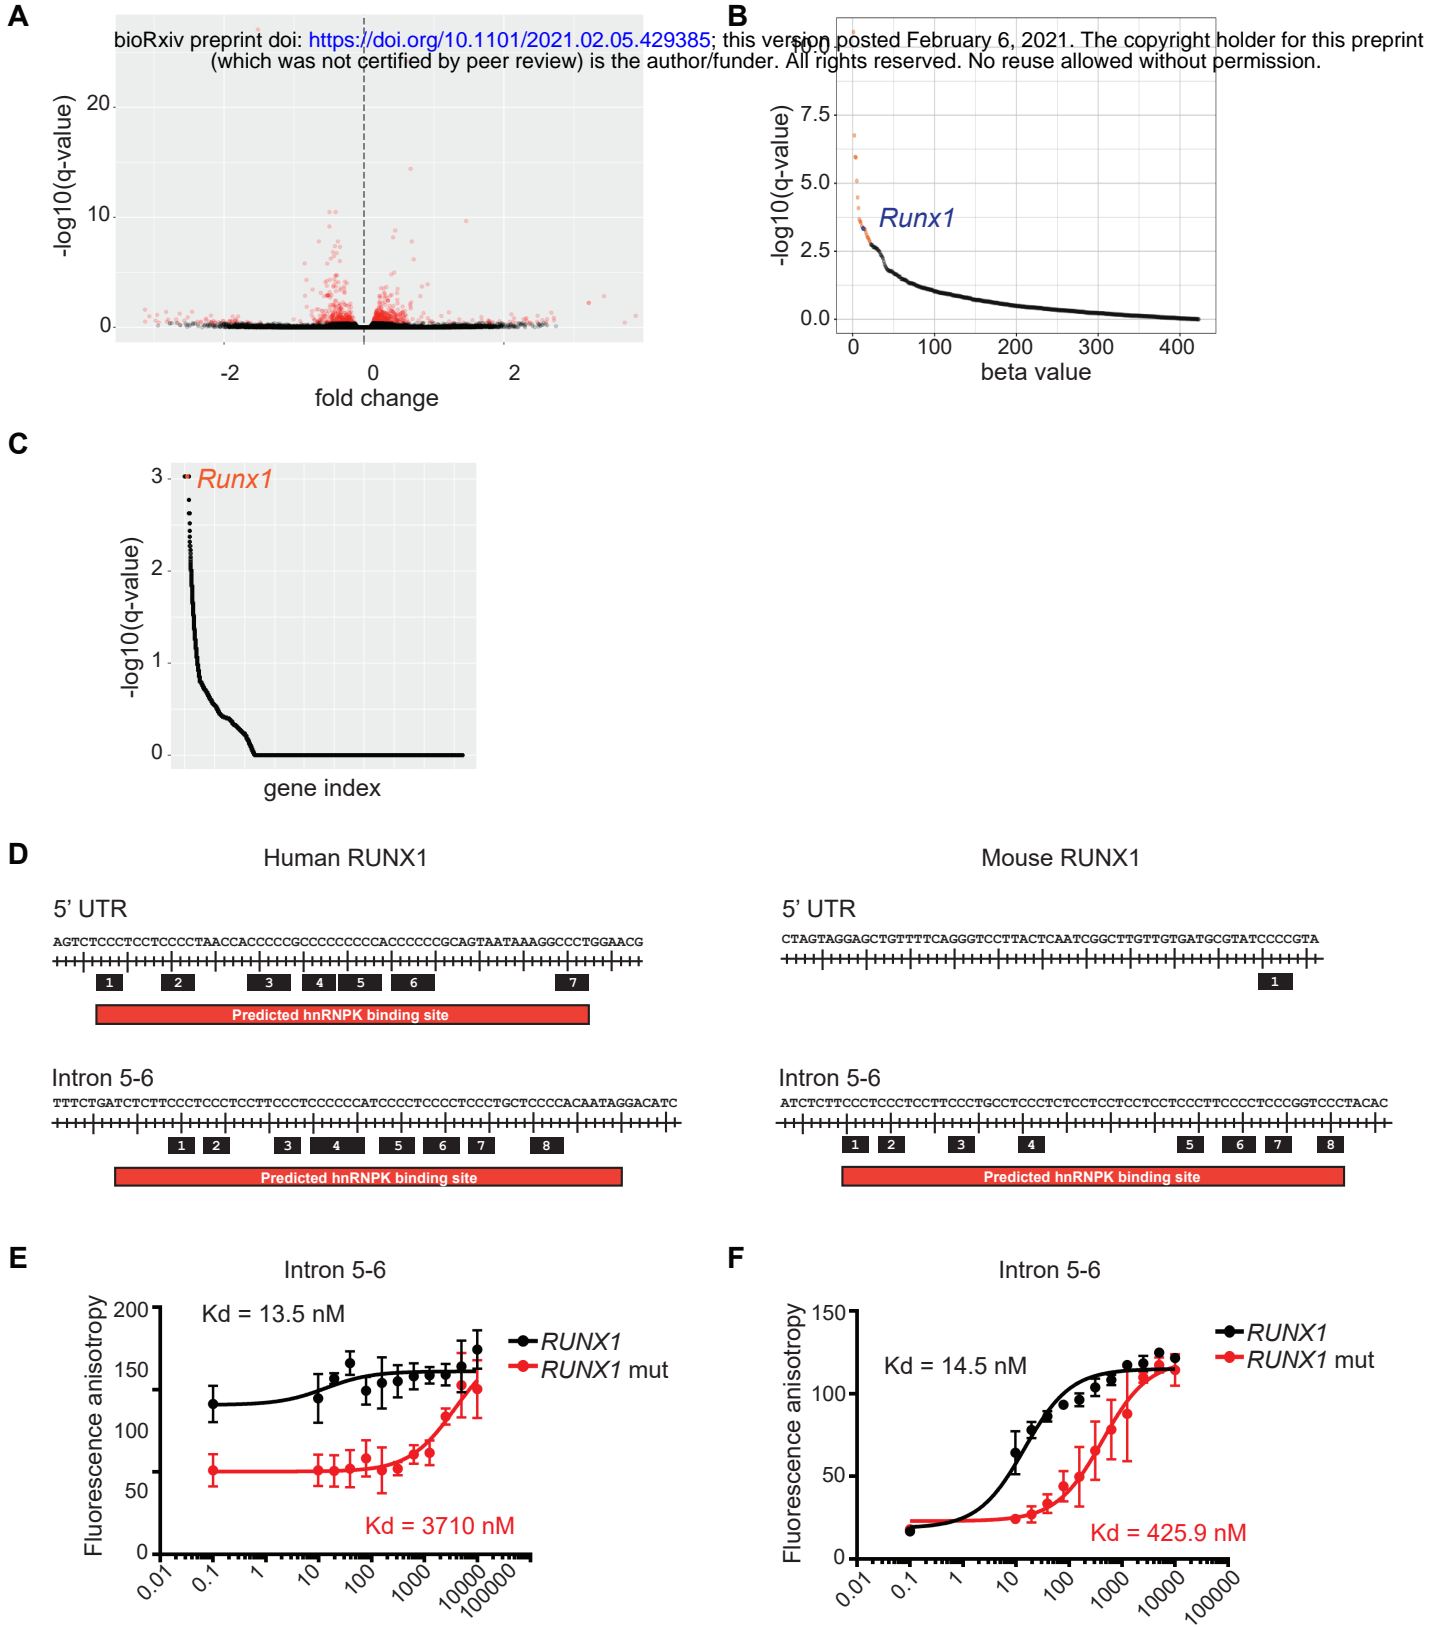



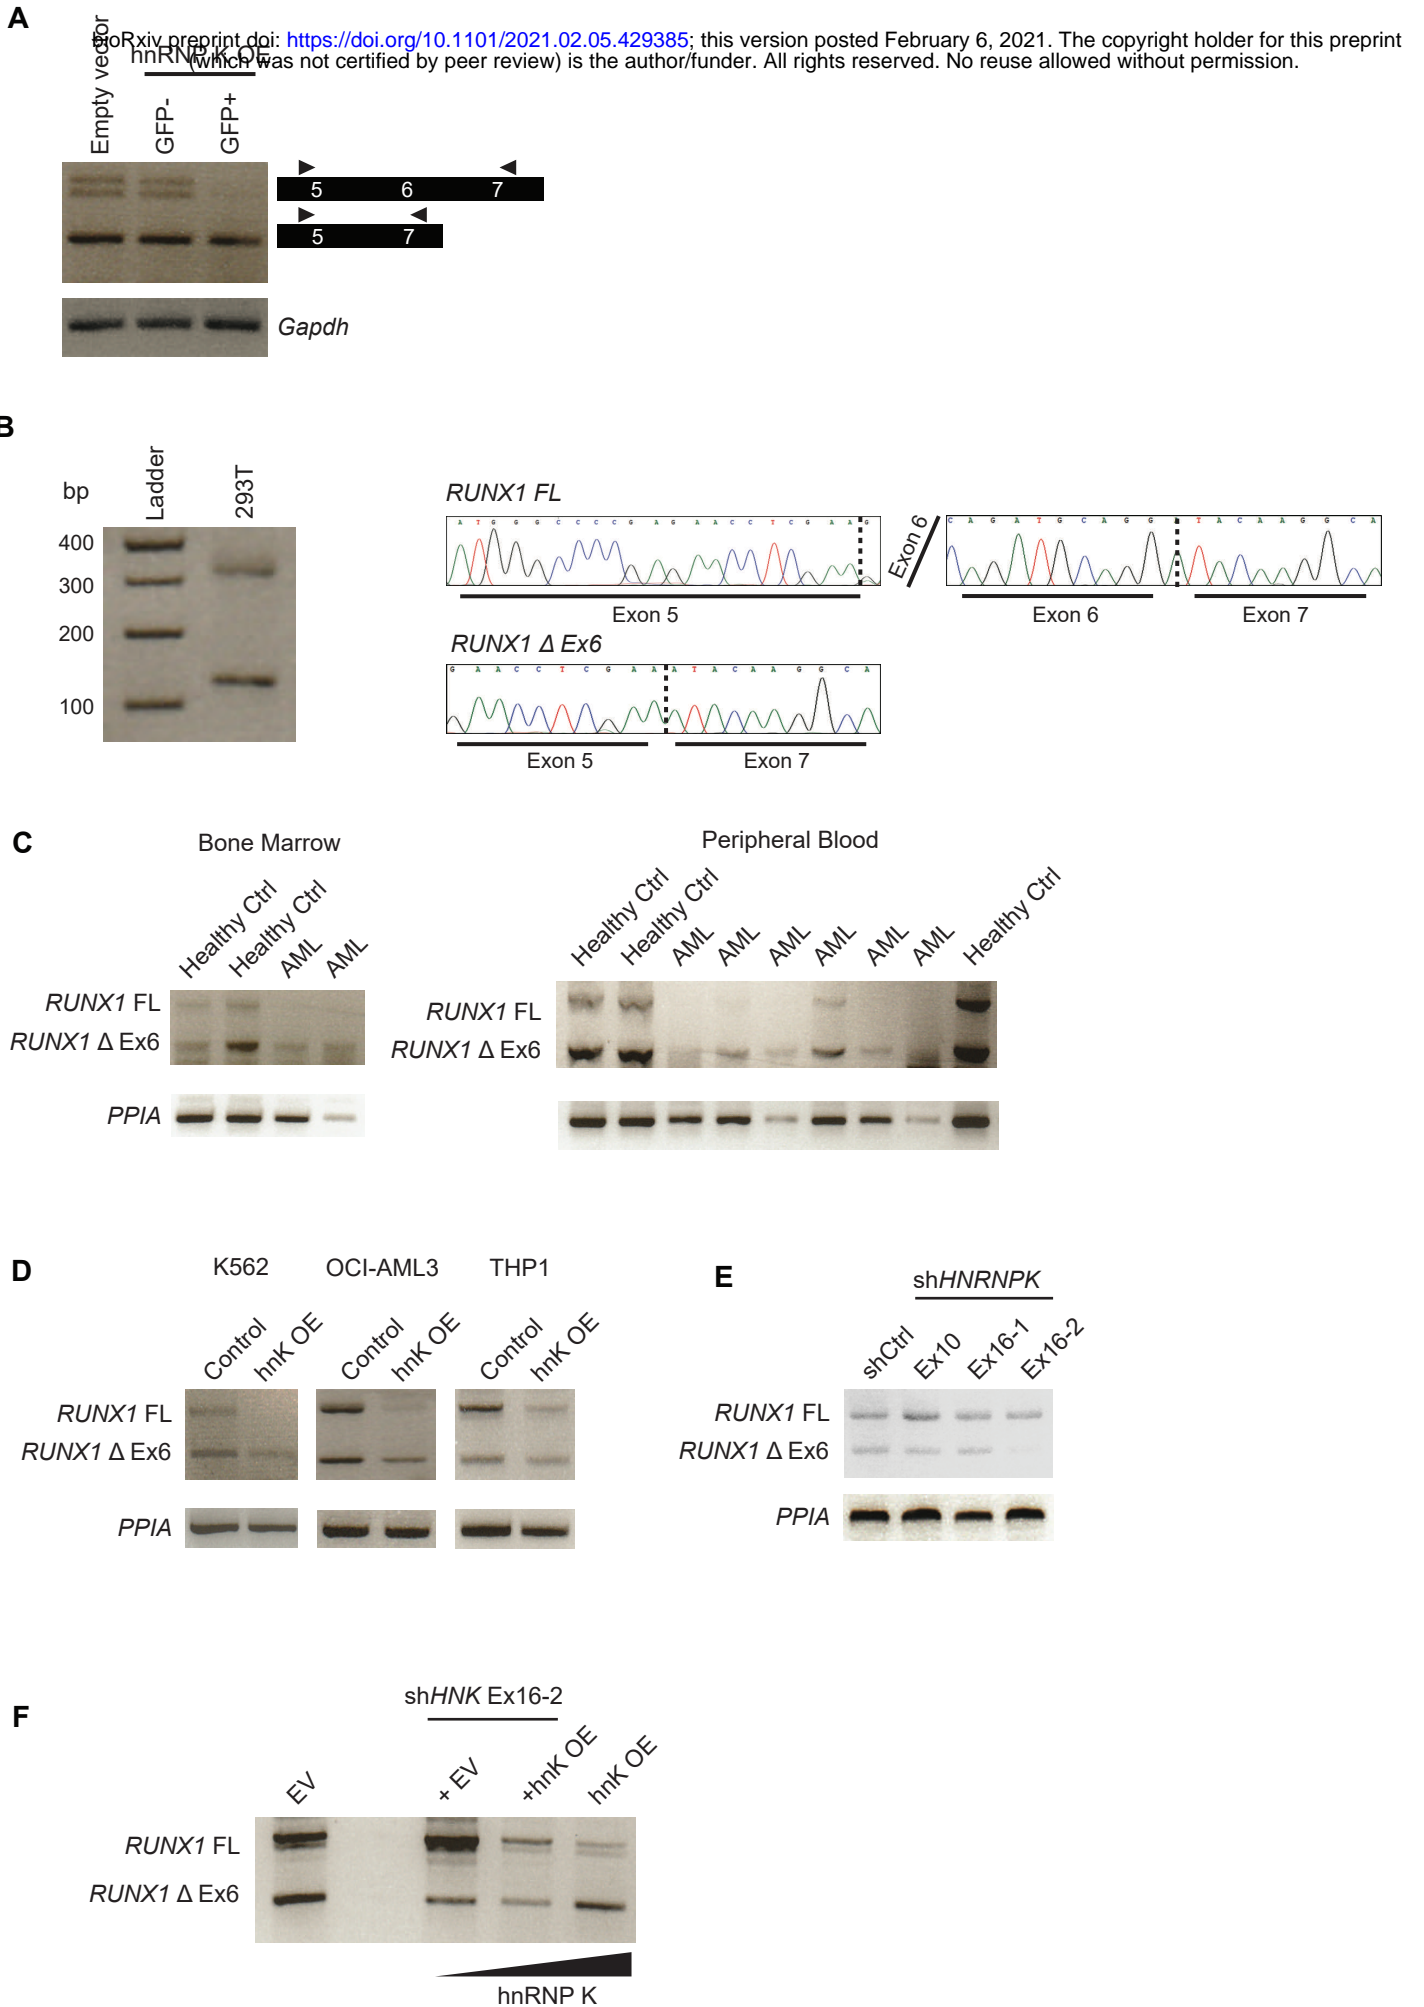

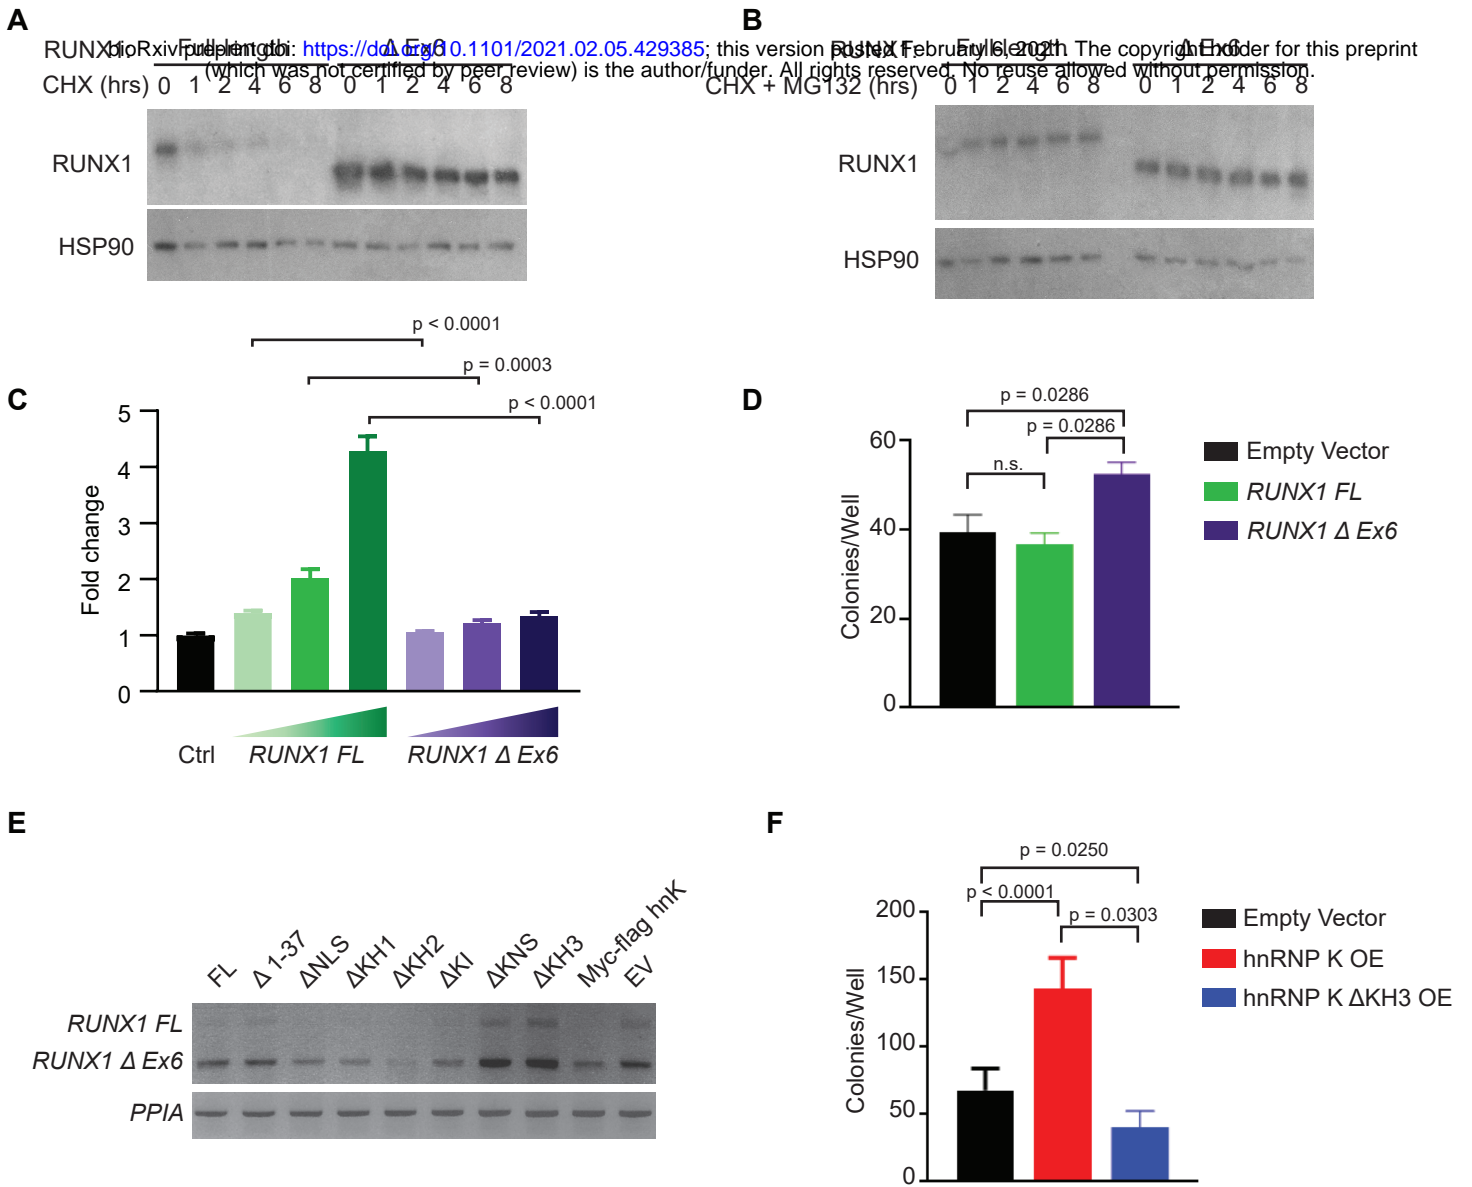

Source: https://www.biorxiv.org/content/biorxiv/early/2021/02/06/2021.02.05.429385.full.pdf
